# Supplementary material for: Residual emissions may perpetuate community-scale inequalities of U.S. air pollution in net-zero scenarios
Source: Research Square preprint supplement (doi:10.21203/rs.3.rs-7359464/v1), 2025-08-20
Supplement: Supplementary file 2 [file e45d9fd543cffd3d8a5d0440.docx]

Supplementary Materials for

**Residual emissions may perpetuate community-scale inequalities of U.S. air pollution in net-zero scenarios**

Candelaria Bergero*, Jing Cheng*, Qiang Zhang, Yang Ou, Haewon McJeon, Destenie Nock, Inês Azevedo, Steven J. Davis*

*corresponding authors: [bergero@wisc.edu](mailto:bergero@wisc.edu), [chengj10@stanford.edu](mailto:chengj10@stanford.edu), [sjdavis@stanford.edu](mailto:sjdavis@stanford.edu)


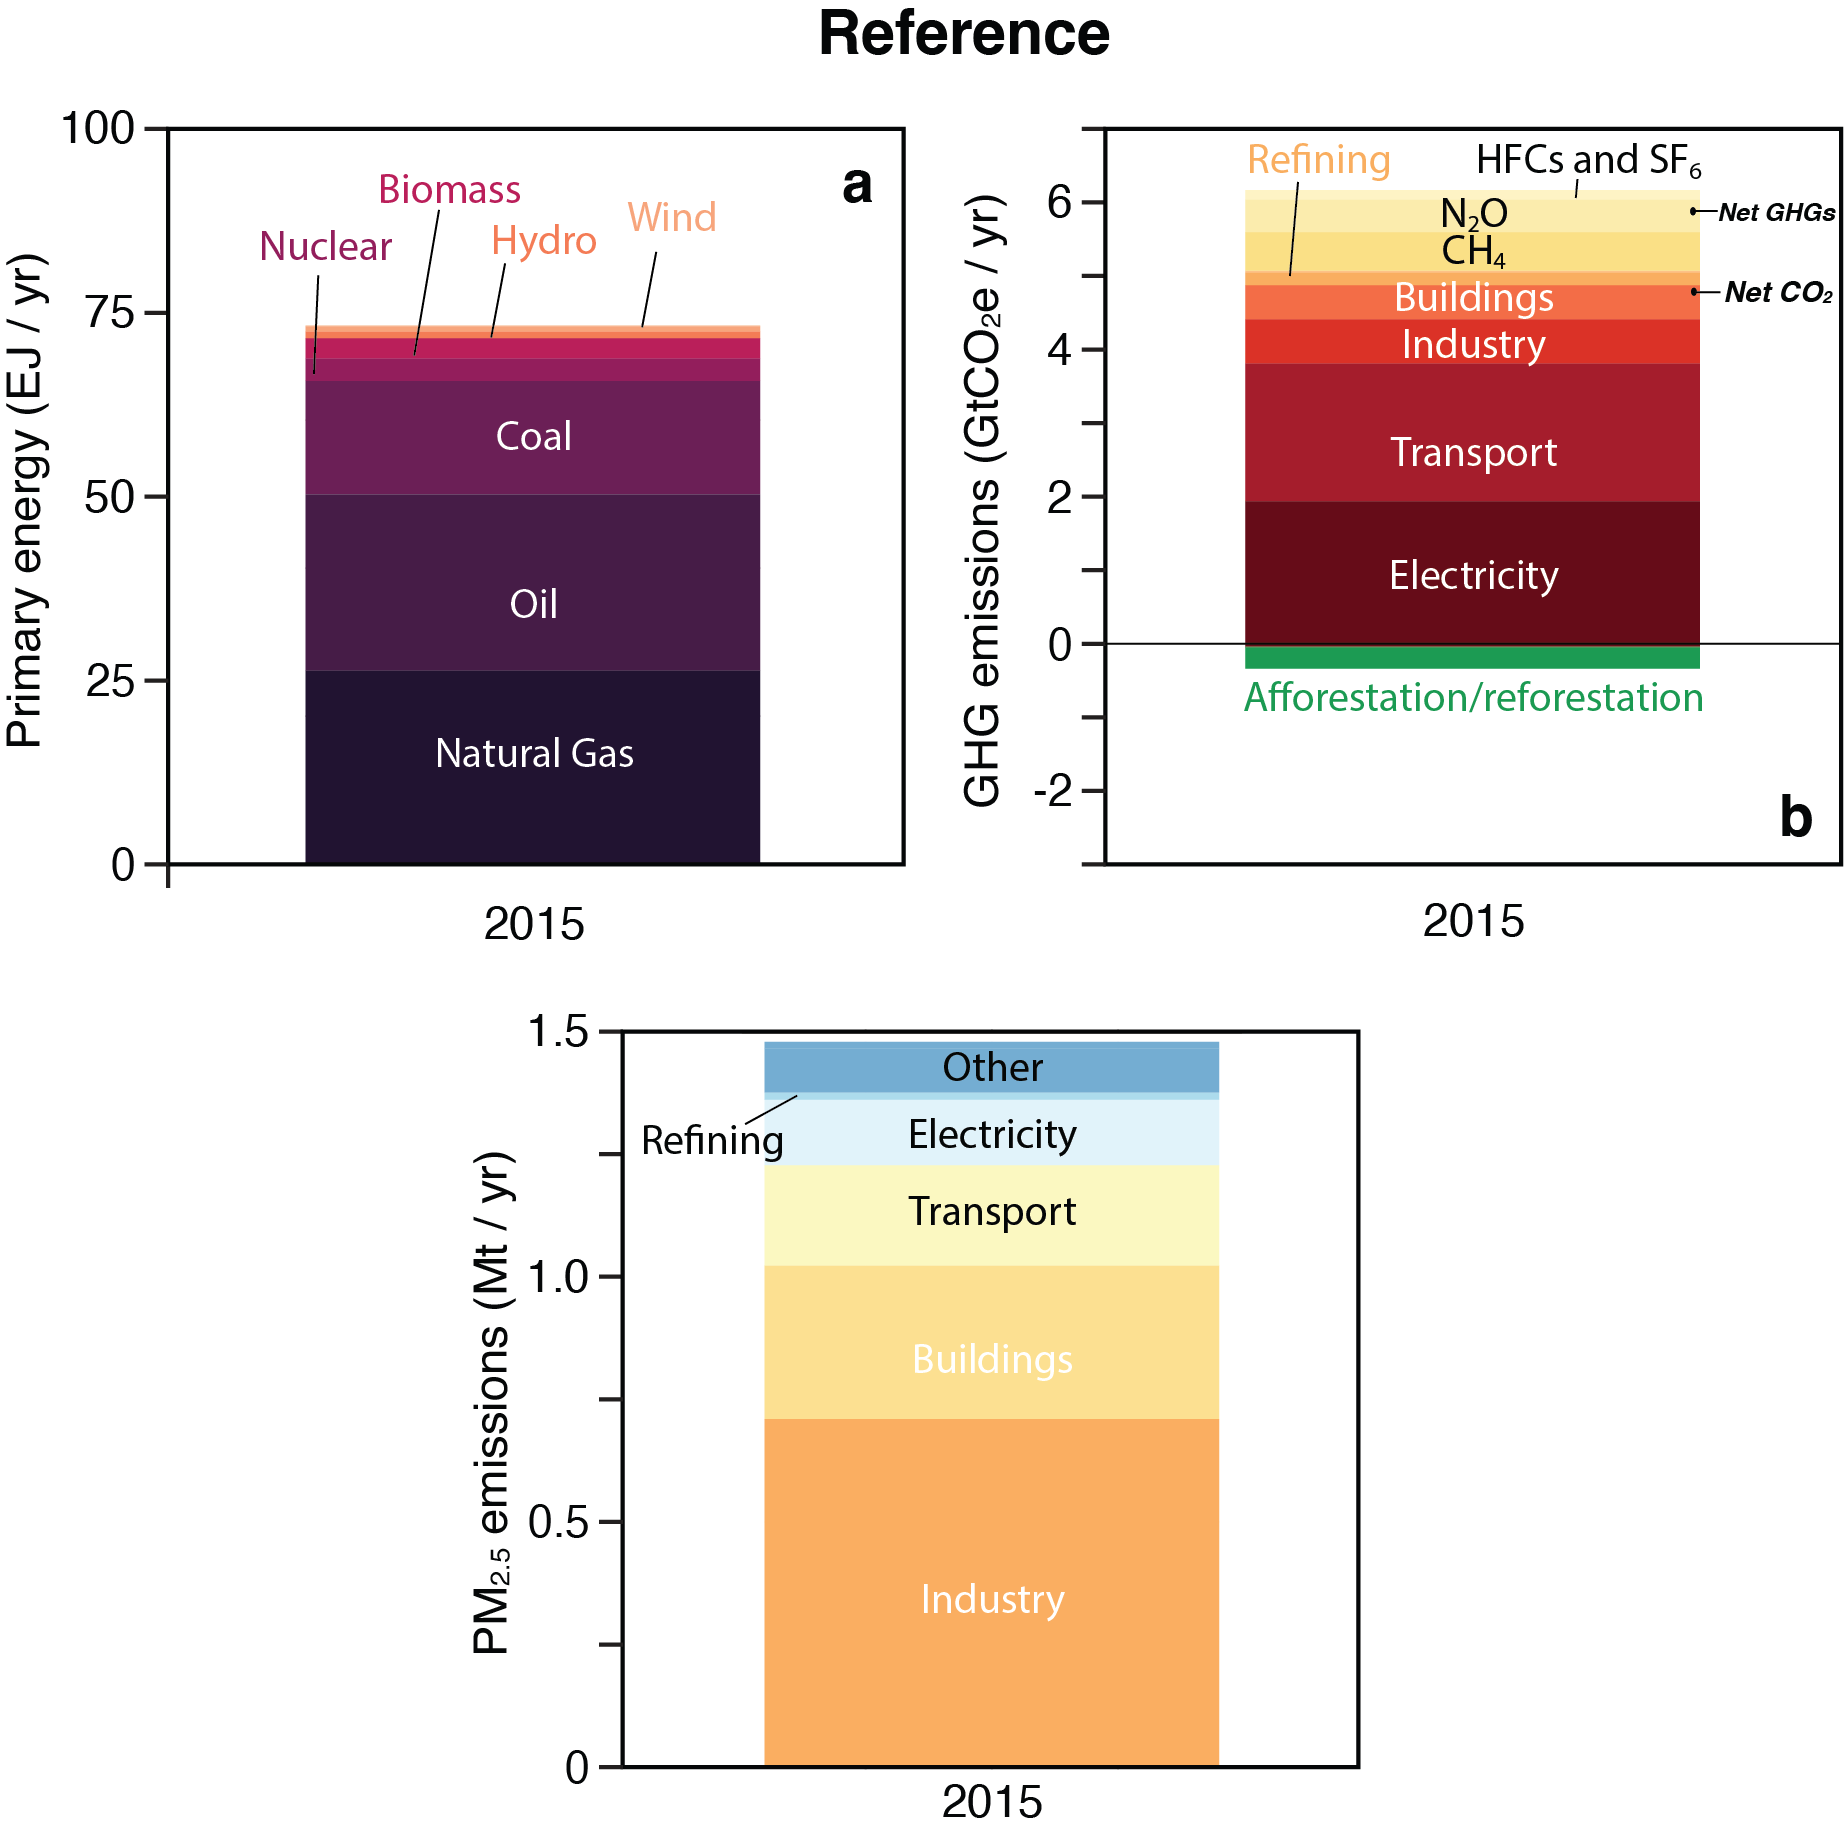


**Supplementary Figure 1 | 2015 base-year GCAM values for the U.S.** Figure shows GCAM results for the contiguous U.S. for 2015 for primary energy production in EJ per year by fuel (**a**), GHG emissions in GtCO2 equivalent per year by sources for CO2 and by gas for non-CO2 (**b**) and PM2.5 emissions in Mt per year by source (**c**).


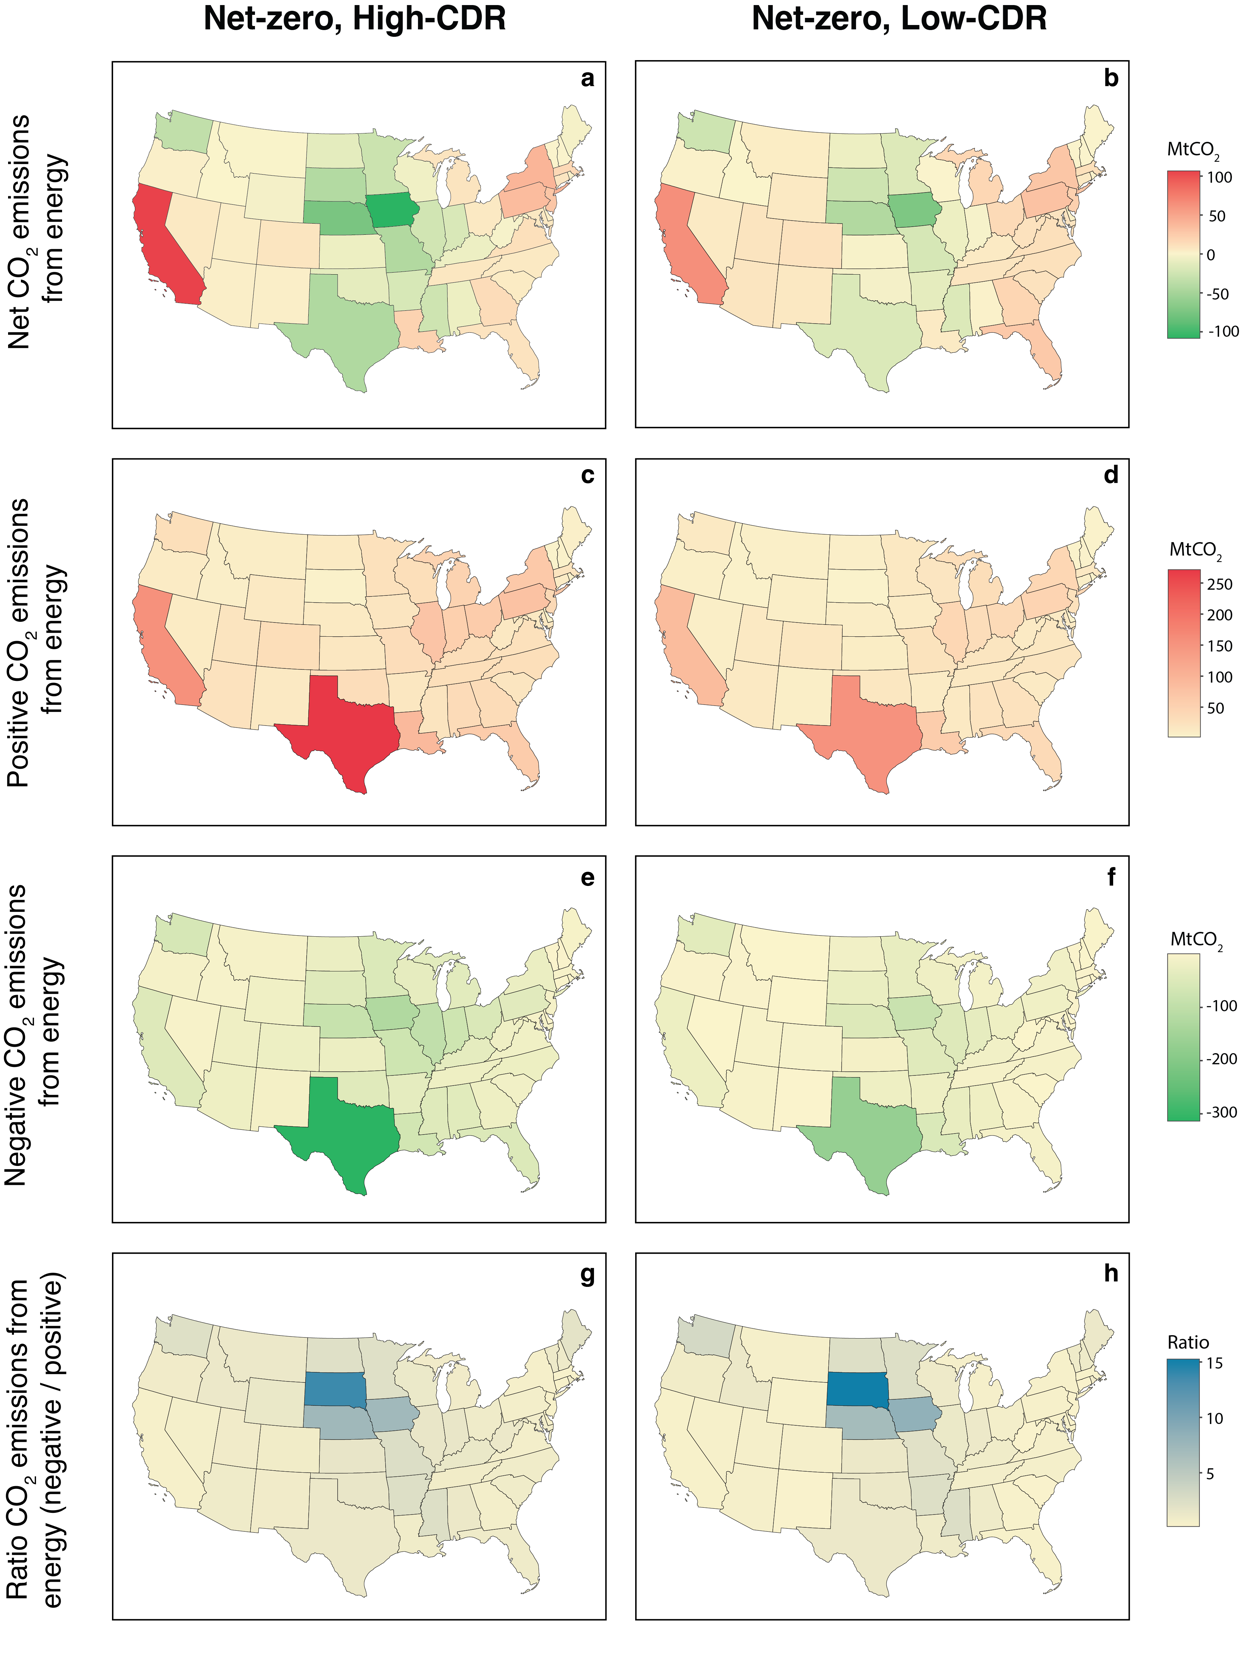


**Supplementary Figure 2 | 2050 CO2 emissions in net-zero scenarios.** The top row shows net CO2 emissions from the energy sector in 2050 in the high- (**a**) and low-CDR (**b**) scenarios per state in MtCO2. The second row show gross positive emissions in each state in the same scenarios (**c**, **d**), while the third row shows gross negative emissions (**e**, **f**). Negative emissions are achieved in GCAM via bioenergy conversion with CCS and DAC. The last row shows the ratio of negative to positive emissions, with darker colors representing states that sequester more carbon than they emit (**g**, **h**).

**
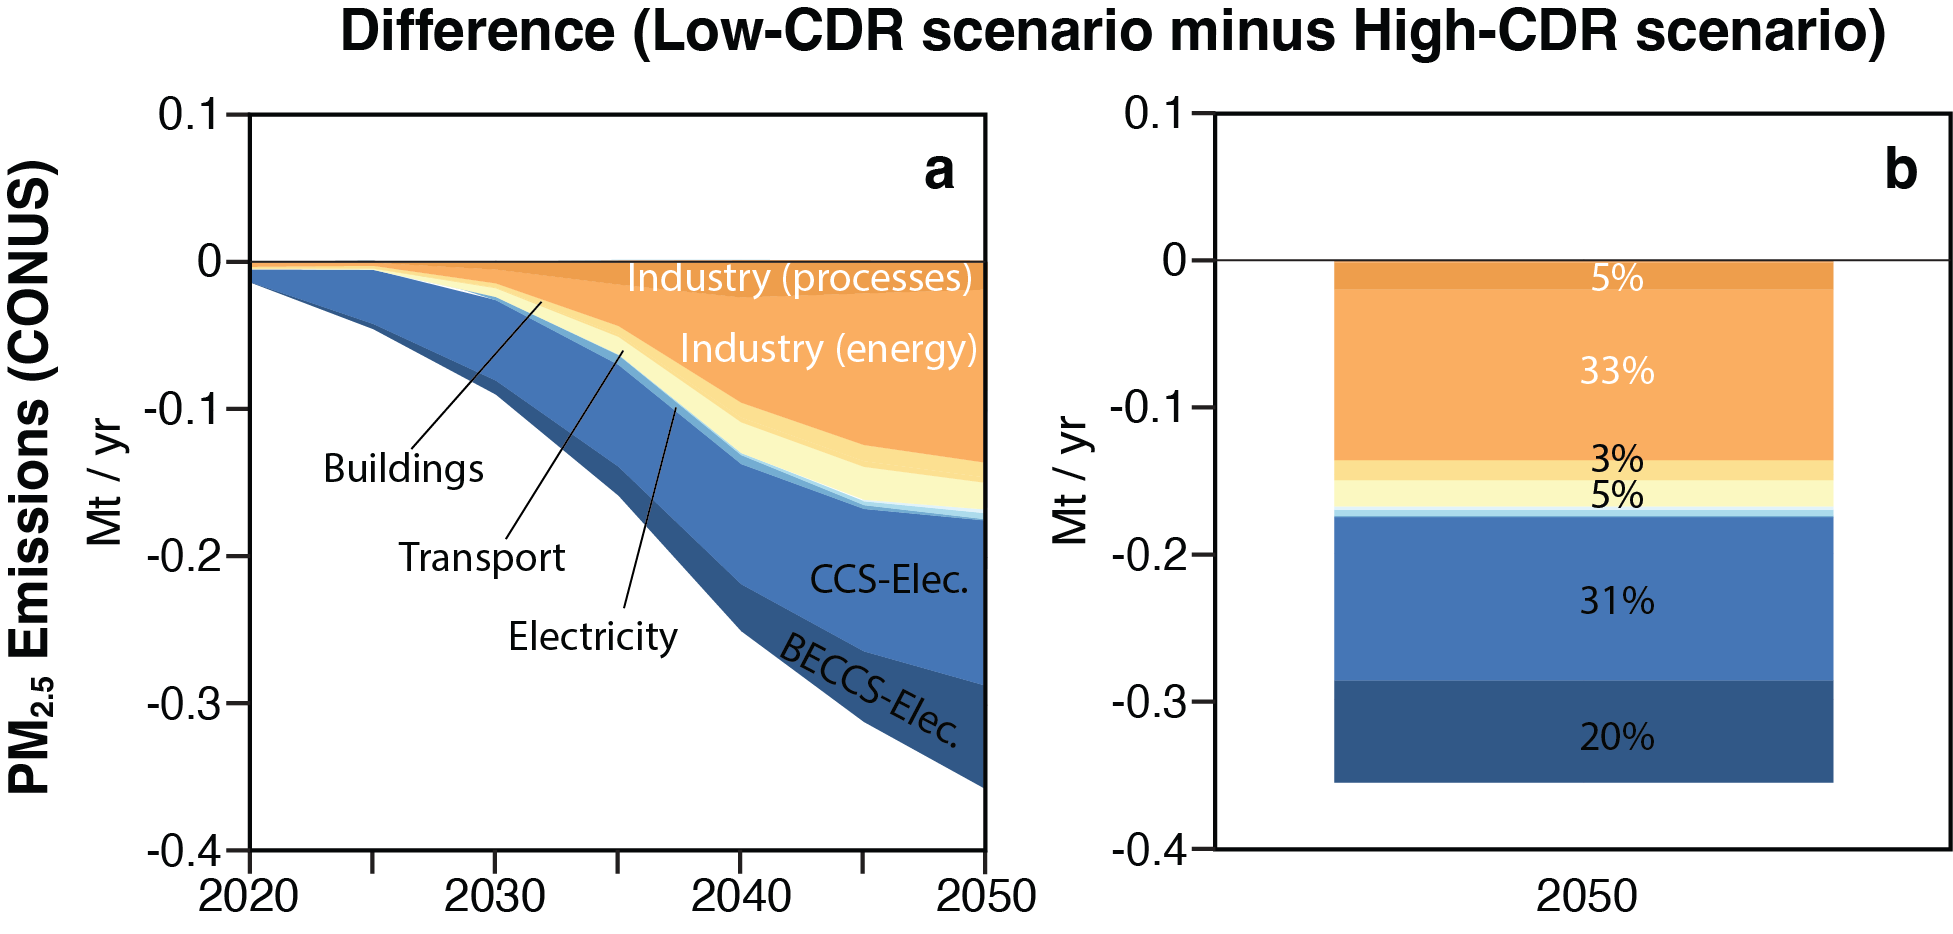
**

**Supplementary Figure 3 | Difference in PM2.5 emissions by sector.** Panel (**a**) shows the difference between the Low- and High-CDR scenarios in PM2.5 emissions from 2020 to 2050. Panel (**b**) shows the difference in 2050. Negative values represent the reduction in PM2.5 emissions in the Low-CDR scenario compared to the High-CDR scenario.


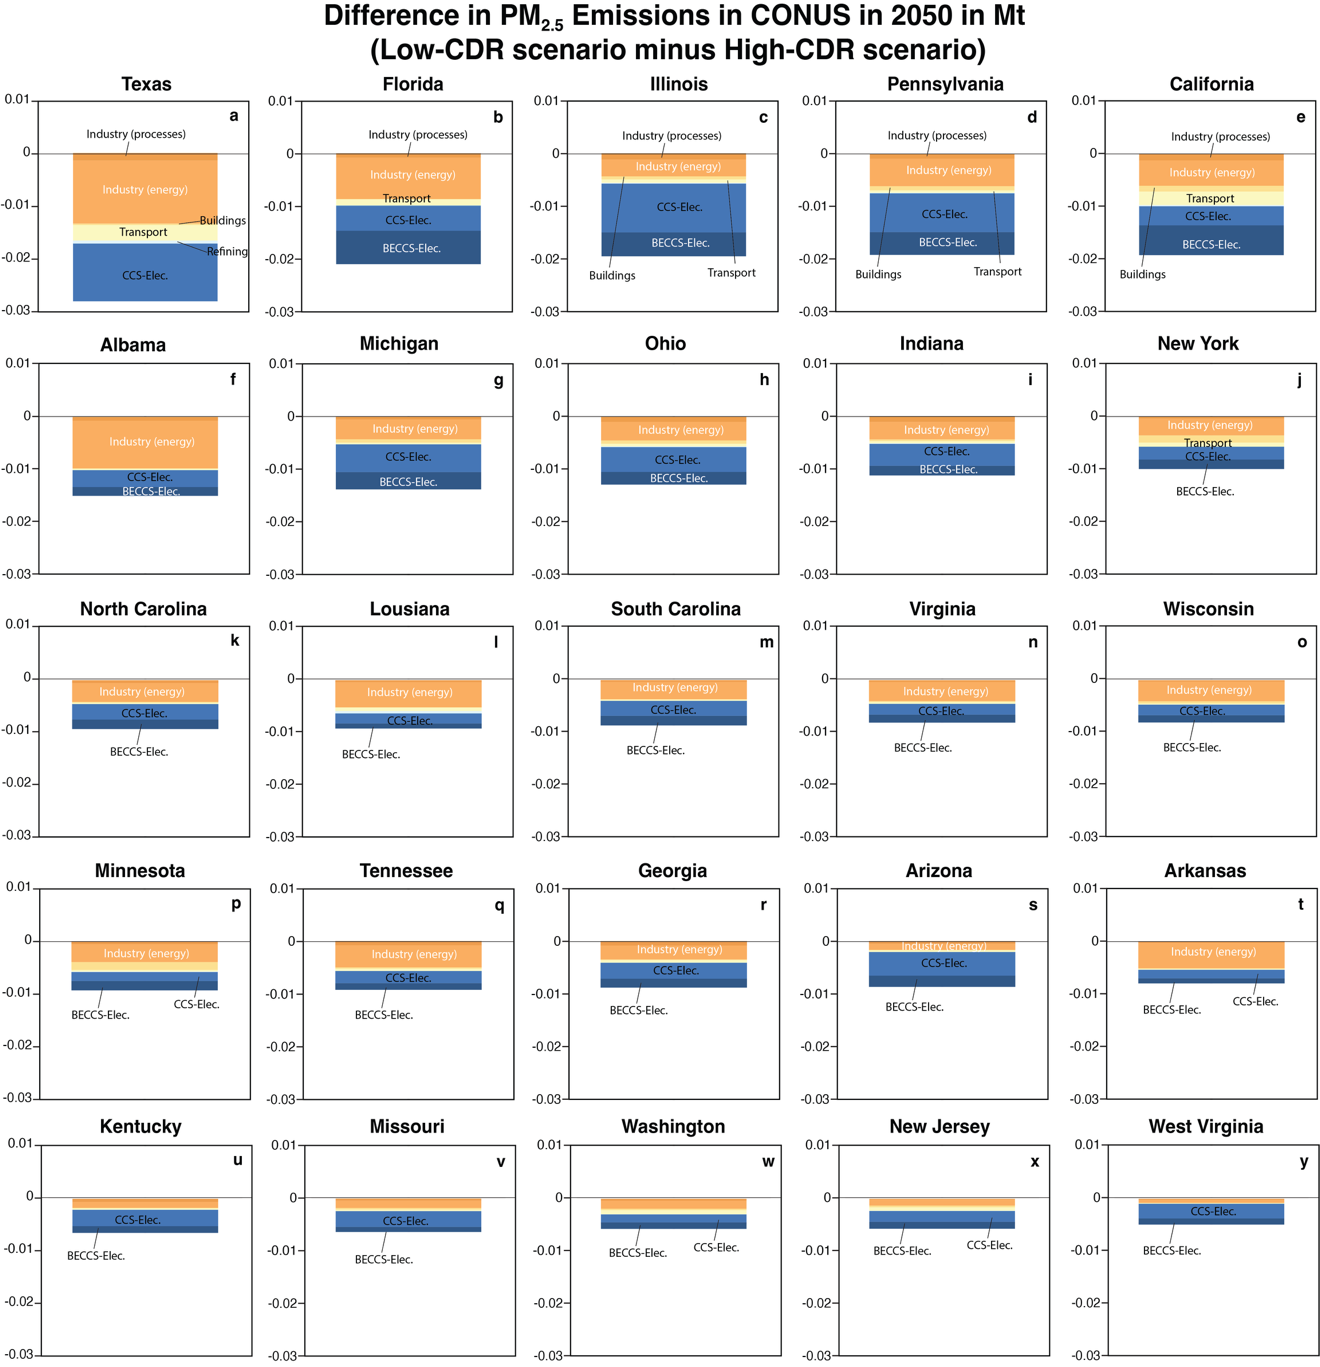


**Supplementary Figure 4 | Difference in PM2.5 emissions by sector in 2050 in Mt per state.** Each panel shows the difference between the Low- and High-CDR scenarios in PM2.5 emissions in 2050 in Mt in each state by sector for the 25th top states in terms of emissions PM2.5.


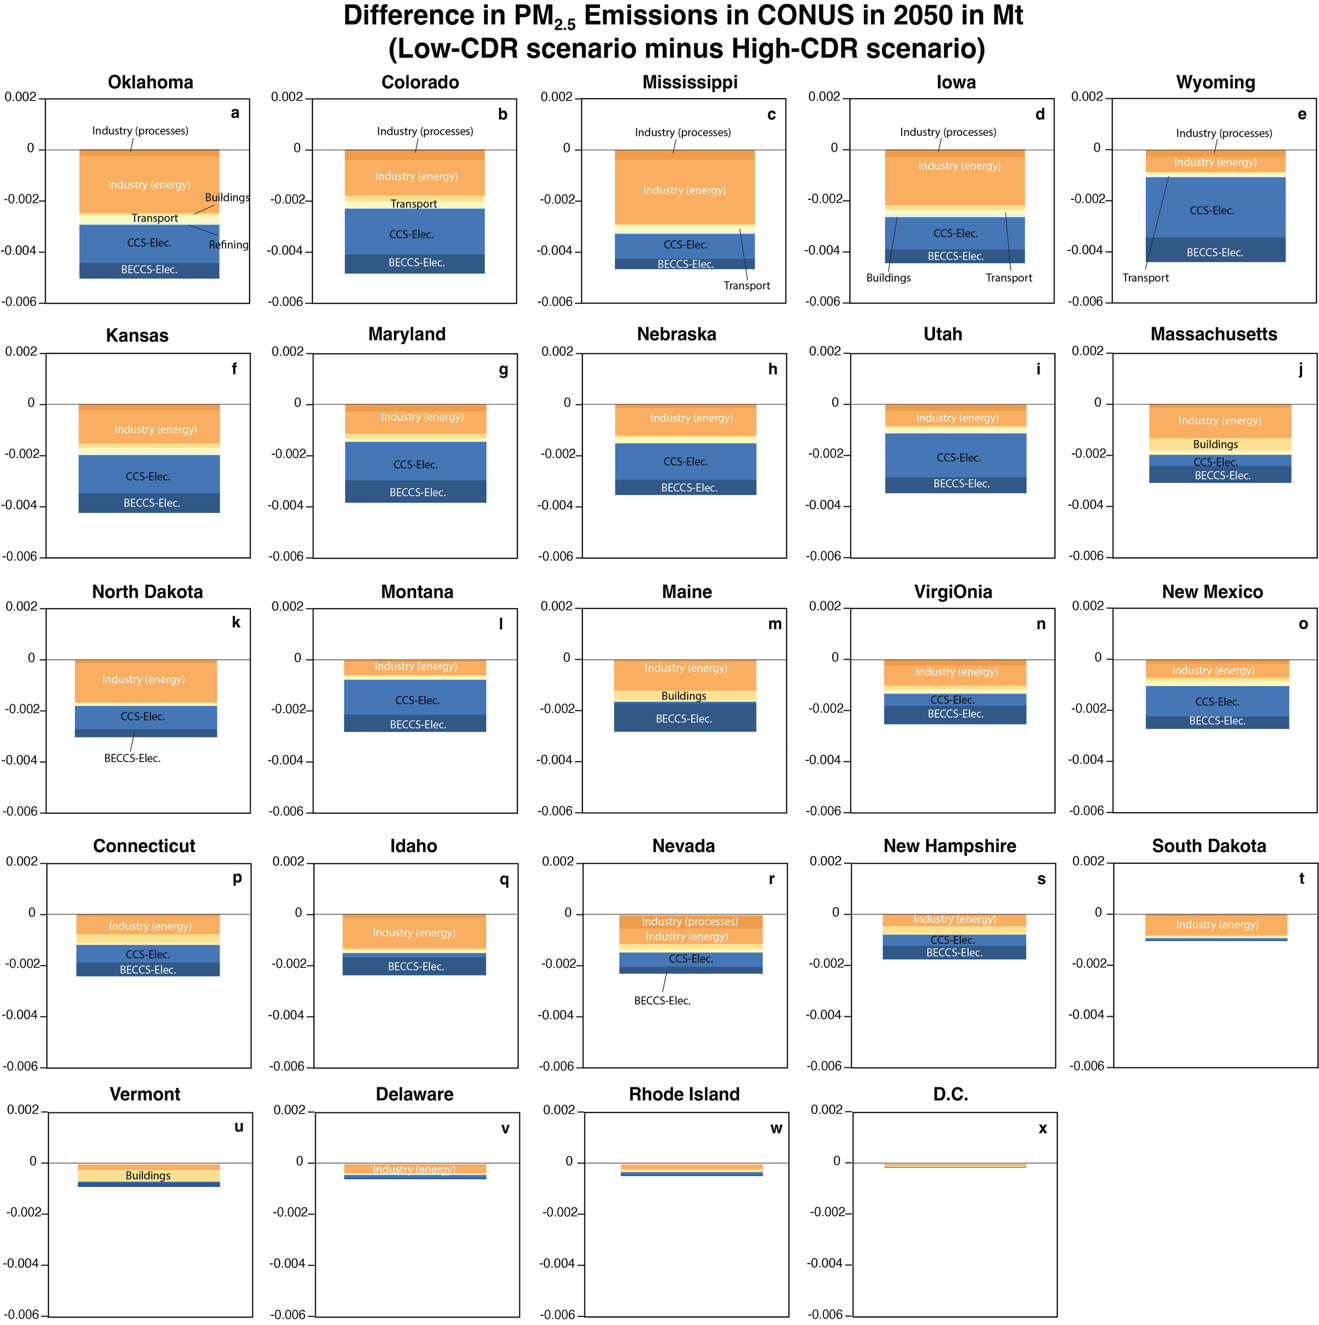


**Supplementary Figure 5 | Difference in PM2.5 emissions by sector in 2050 in Mt per state.** Each panel shows the difference between the Low- and High-CDR scenarios in PM2.5 emissions in 2050 in Mt in each state by sector for the 25th bottom states in terms of PM2.5 emissions. Note different scale compared to Supplementary Fig. 3.


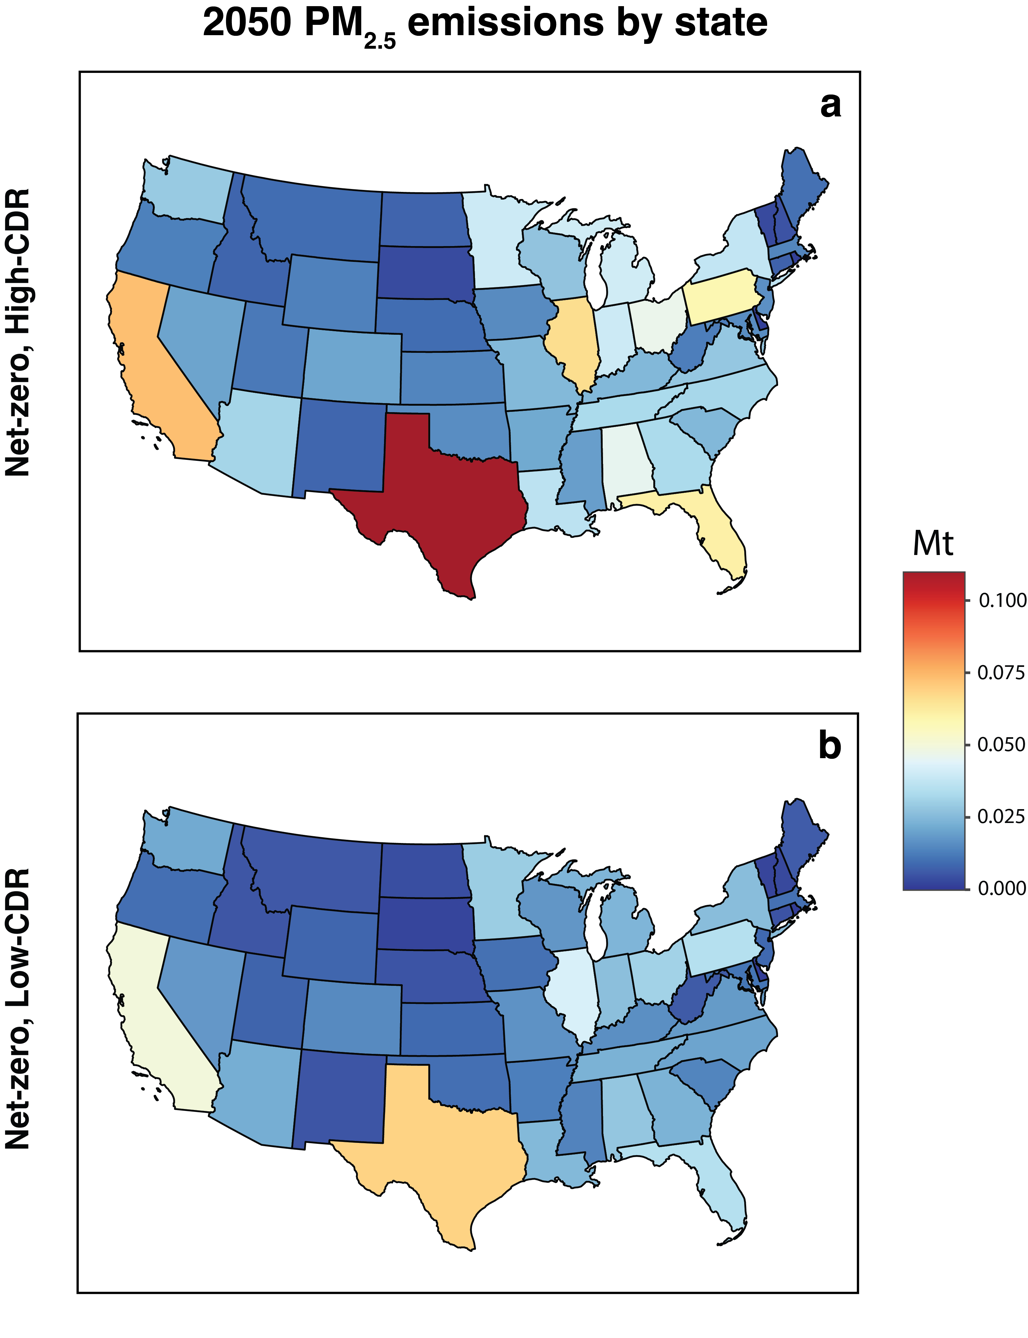


**Supplementary Figure 6 | Total PM2.5 emissions in net-zero scenarios in each state in the contiguous U.S. in 2050.** Panel (**a**) shows total PM2.5 emissions per state in Mt per year in the high-CDR scenario, while panel (**b**) shows the same information for the low-CDR scenario.


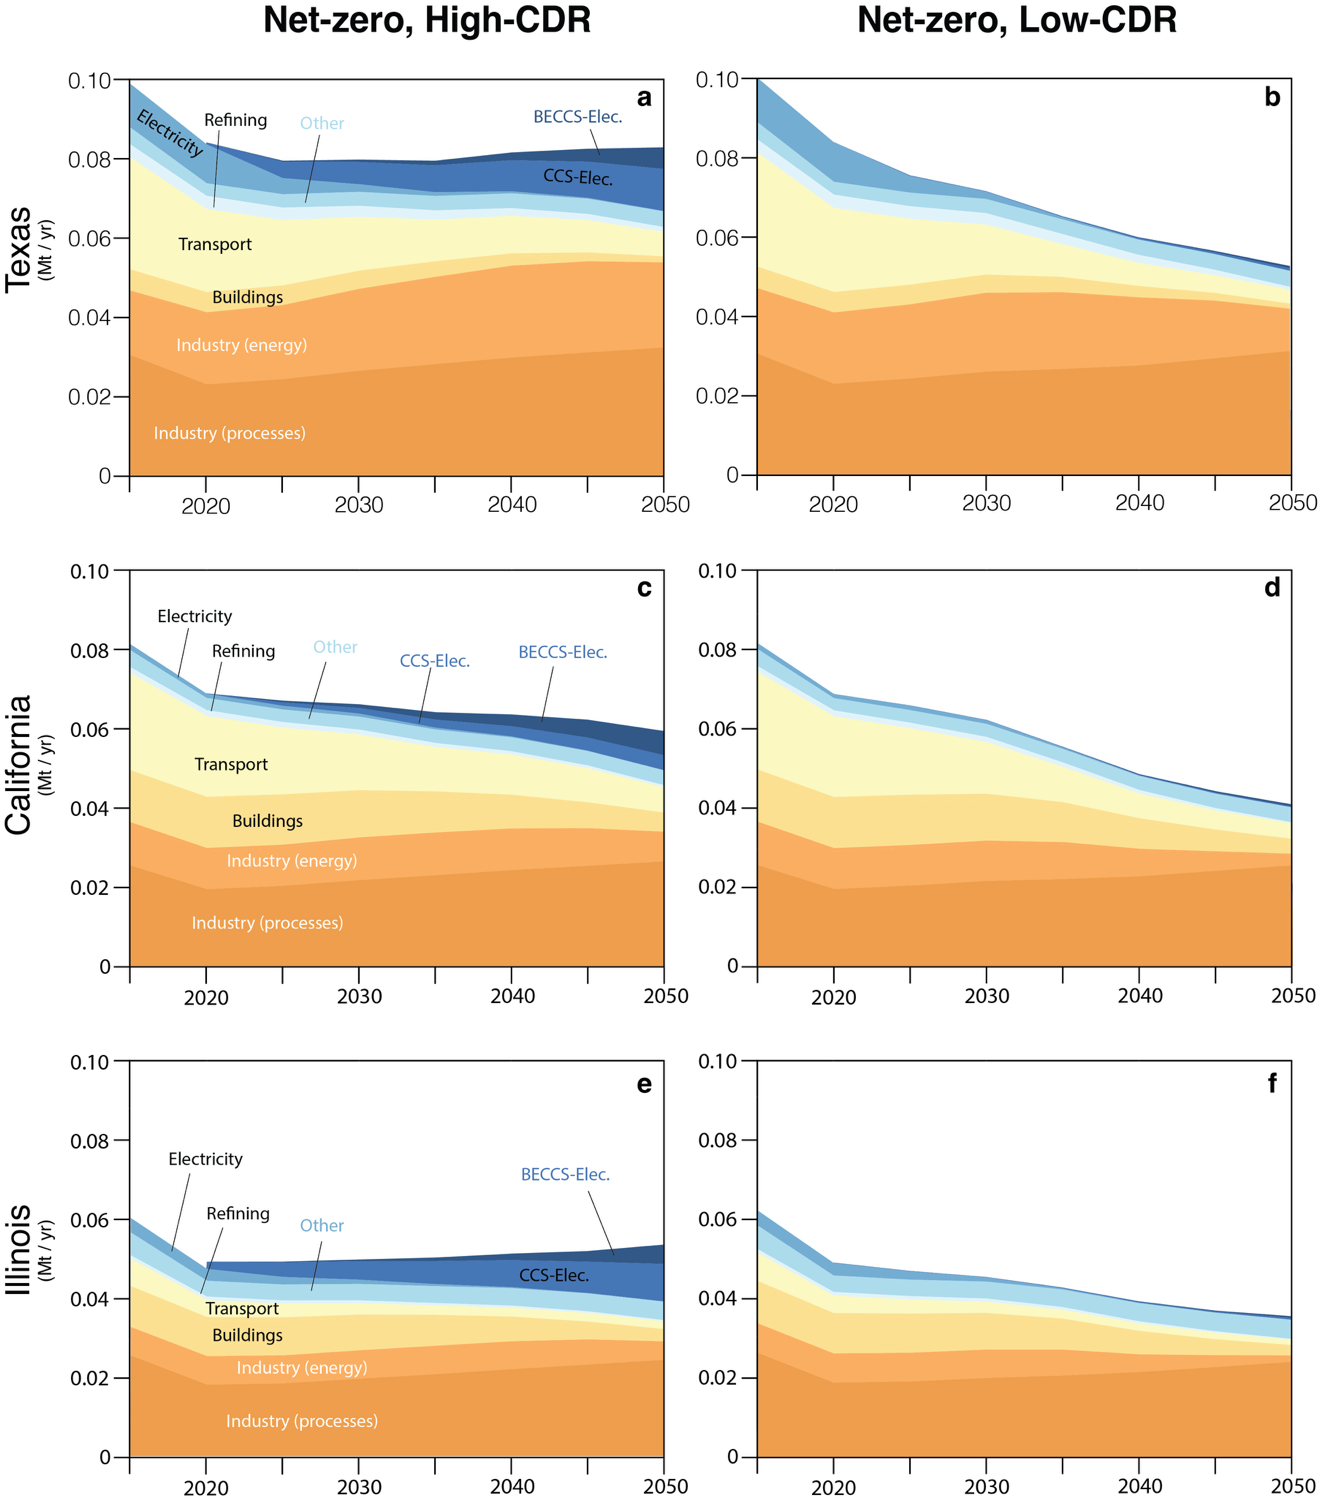


**Supplementary Figure 7 | PM2.5 emissions in net-zero scenarios in the three largest emitters in 2050.** The top row shows PM2.5 emissions in Texas in Mt per year from 2015 to 2050 in the high- (**a**) and low-CDR (**b**) scenarios by source. The second for shows PM2.5 emission for California (**c**, **d**), and the third for Illinois (**e**, **f**). Sources include industry, buildings, transportation, electricity generation, refining, electricity with BECCS and others (which includes resource production, urban processes).


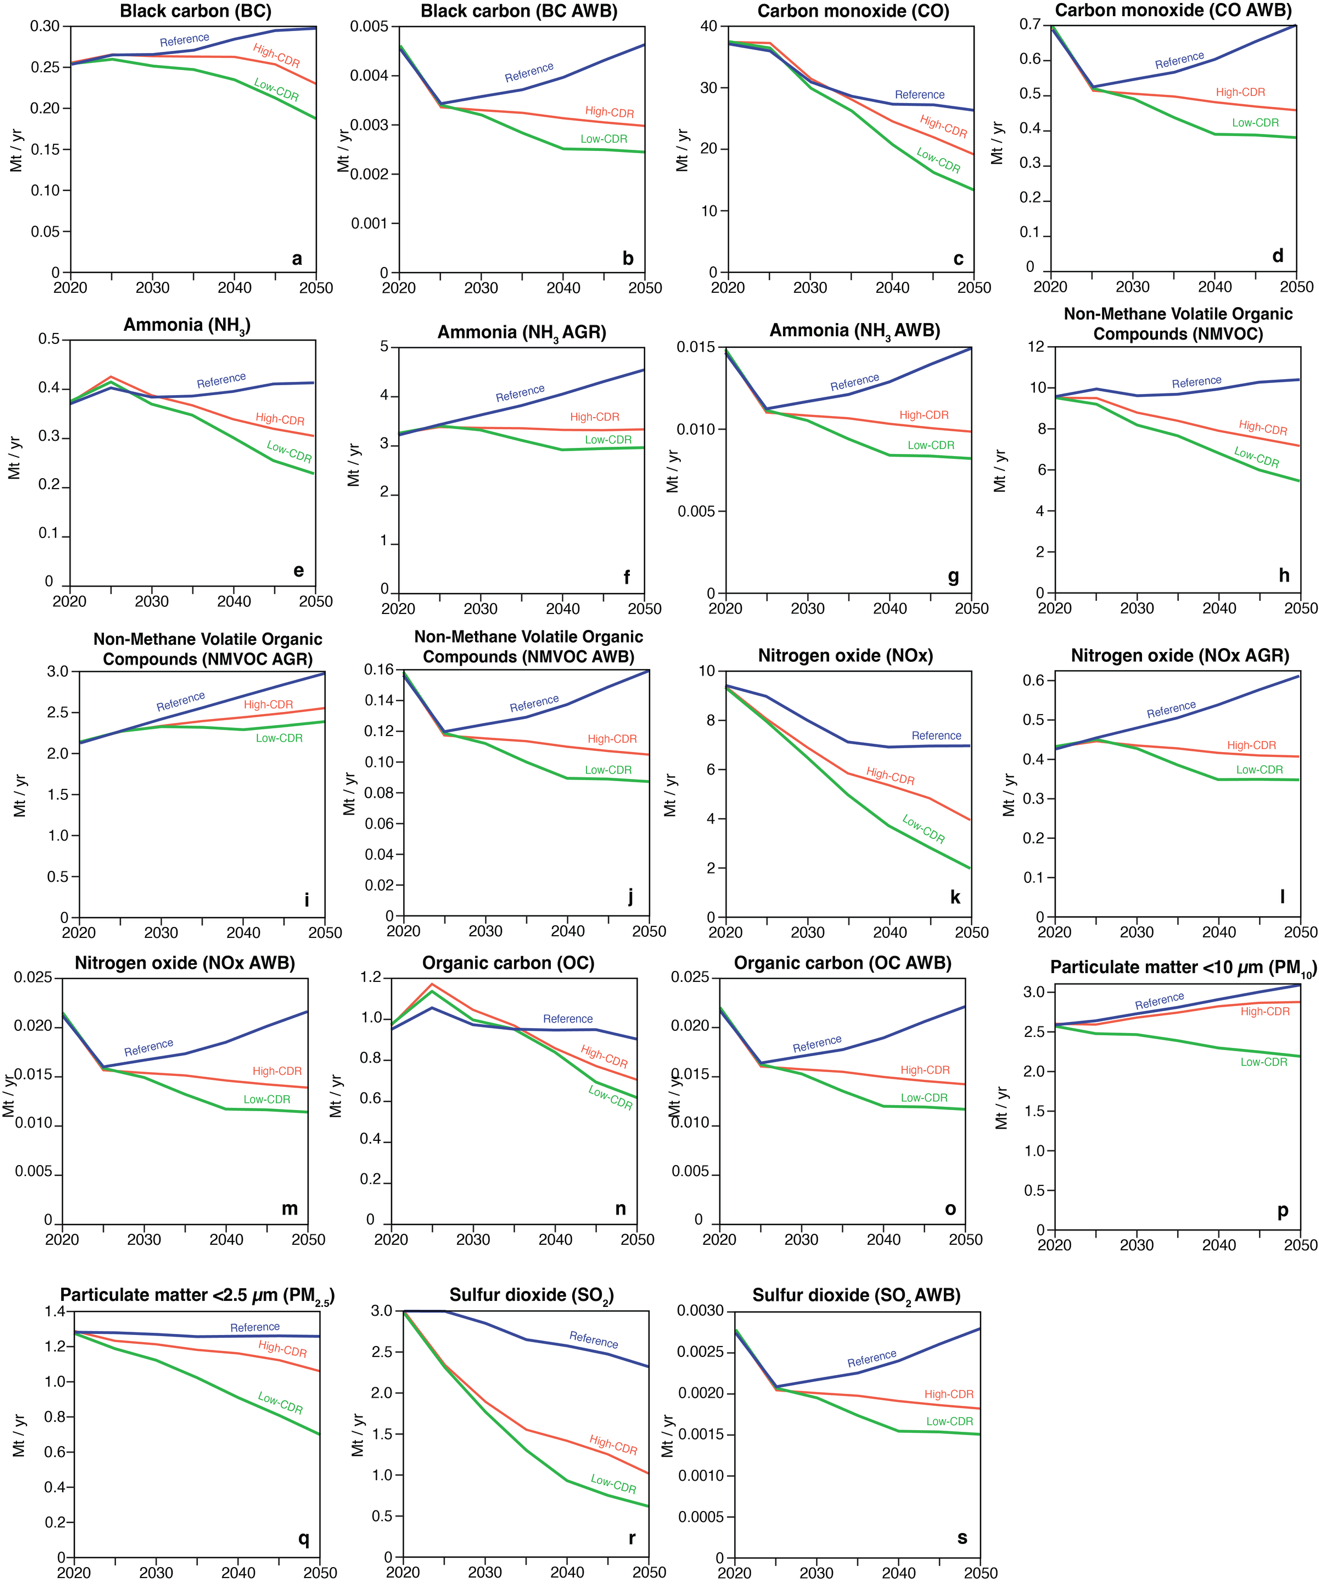


**Supplementary Figure 8 | Air pollutants in the US 2020-2050 by species**, including agriculture (AGR) and agriculture waste burning (AWB), in each scenario.


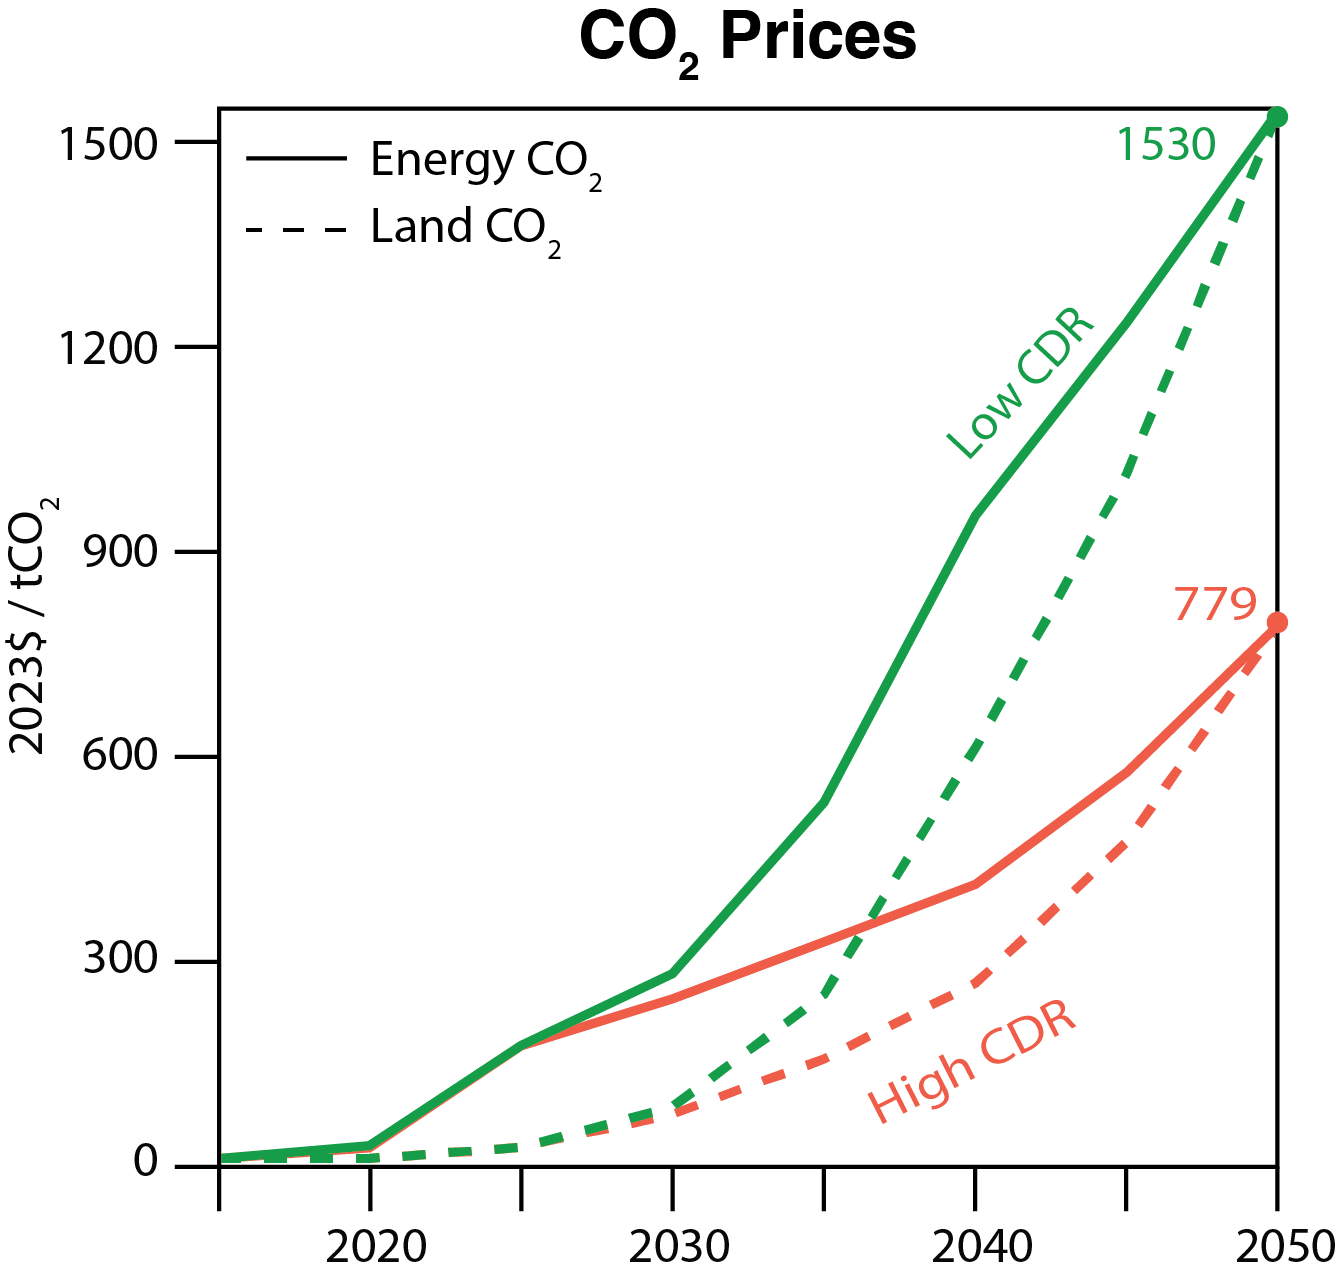


**Supplementary Figure 9 | CO2 prices in GCAM in the U.S.** Figure represents CO2 prices in both net-zero scenarios. Green lines represent the low-CDR scenario and orange lines represent the high-CDR scenario. Solid lines are the prices applied to CO2 from the energy system, while the dashed lines represent the price on CO2 from land.


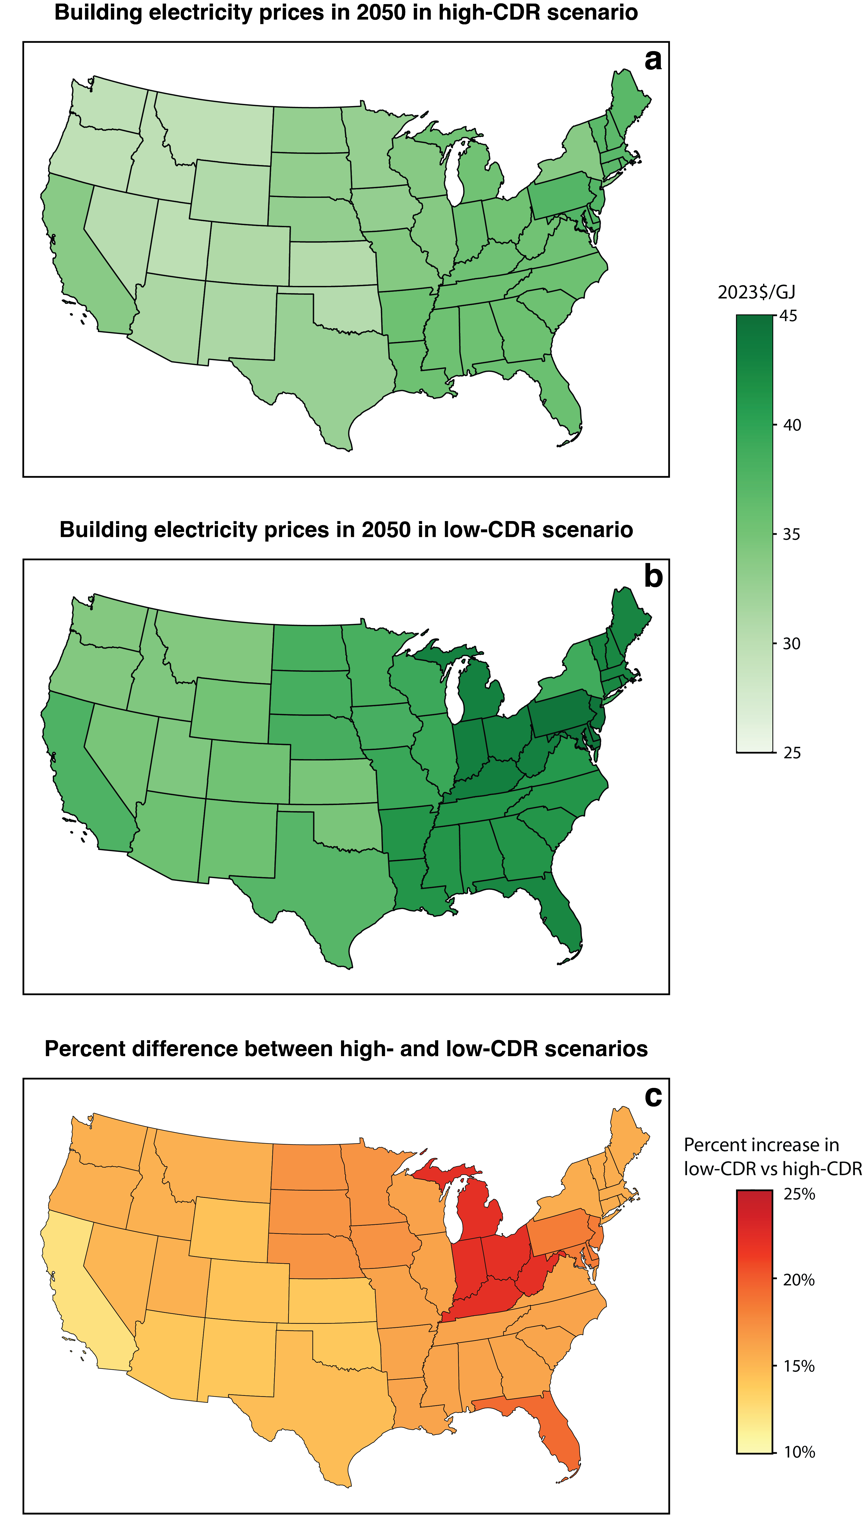


**Supplementary Figure 10 | Buildings electricity prices.** Panels **a** and **b** show buildings electricity prices in 2050 in 2023$/GJ in each state in the contiguous U.S. based on GCAM outputs in the high-CDR scenario (**a**) and low-CDR scenario (**b**). Panel **c** shows the percent increase in buildings electricity prices in the low-CDR scenario compared to the high-CDR scenario in 2050.


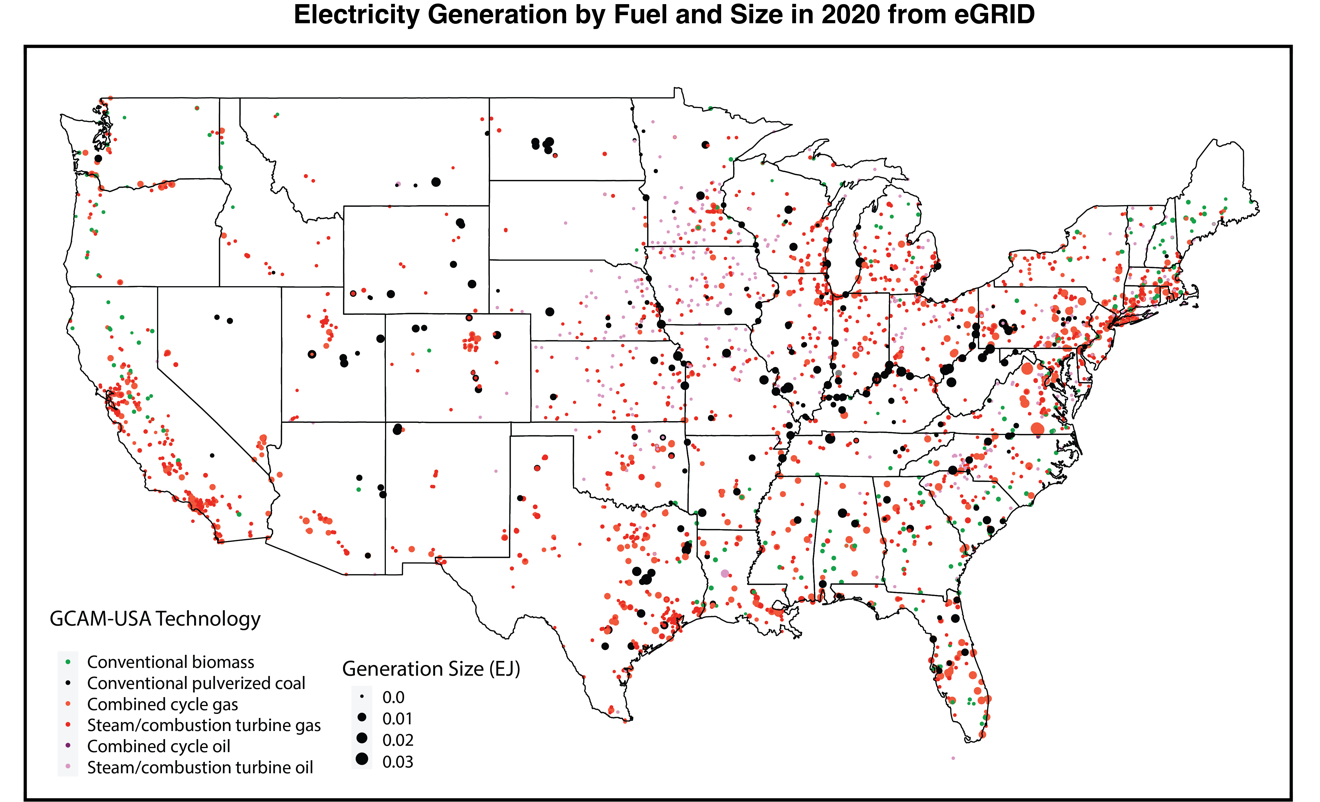


**Supplementary Figure 11 | Electricity generation in the contiguous U.S. in 2020.** Each dot represents a generation site, the size of the dot shows the generation size in EJ, and the color shows the fuel and technology for combustion in 2020 based on eGRID. This is the baseline we use to retire or add new generators described in the Methods. We start with a total of 30,193 generating sources in the database. We then filter for combustion sources only (coal, gas, oil, and biomass) which has 16,941 data points. We filter for operating and planned generators (specifically, we filter for status: "OP", "P", "T", "TS", "L", "OA", "U", "V"), which decreases the number to 11,105 generators, and we finally remove generators with negative generation, which leads to a total of 10,707 generators. These are the generators we use as a base in our analysis.


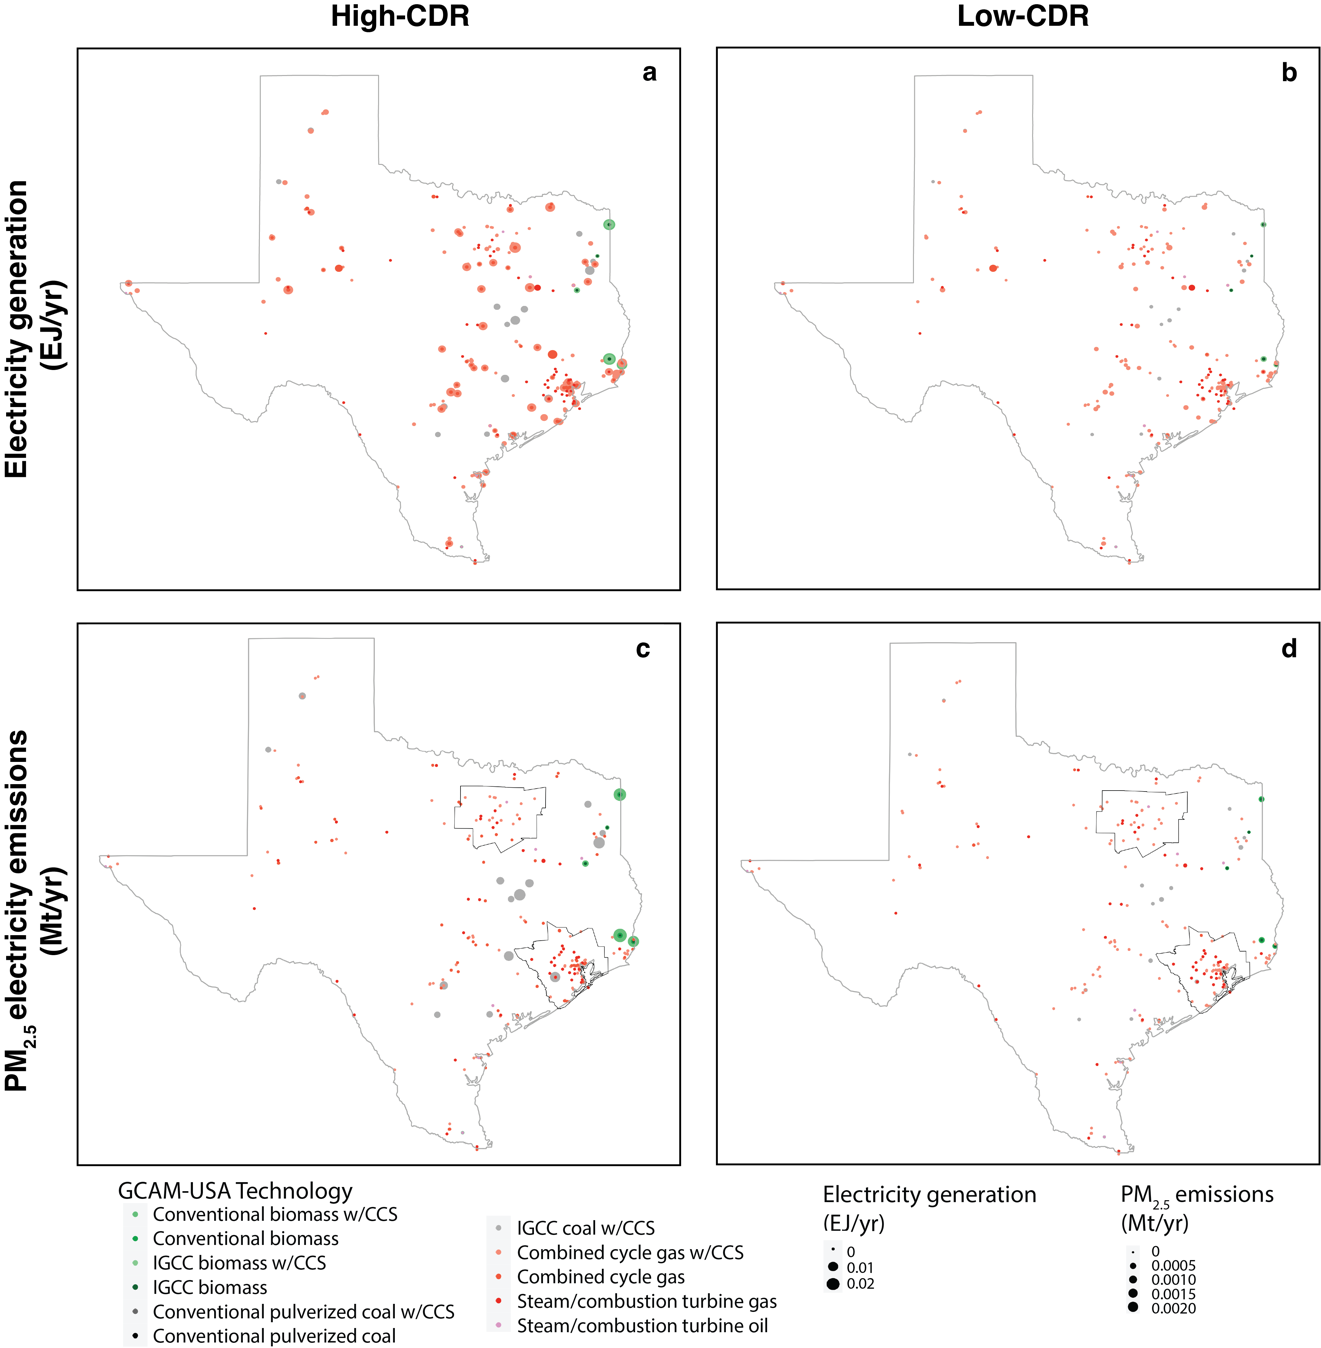


**Supplementary Figure 12 | Downscaled electricity generation and PM2.5 emissions in Texas in 2050.** Panels **a** and **b** show electricity generation in Texas in EJ in 2050. Each dot represents a generation site, the size the EJ generated and the color the fuel and technology, in the high-CDR (**a**) and low-CDR (**b**) scenarios. Panels **c** and **d** represent the PM2.5 emissions from electricity generation in the same state in Mt in 2050. The size represents the amount emitted and the color the power plant type. The inner boundaries in the last row panels represent the cities of Dallas and Houston, which are also modeled at a 1km resolution.


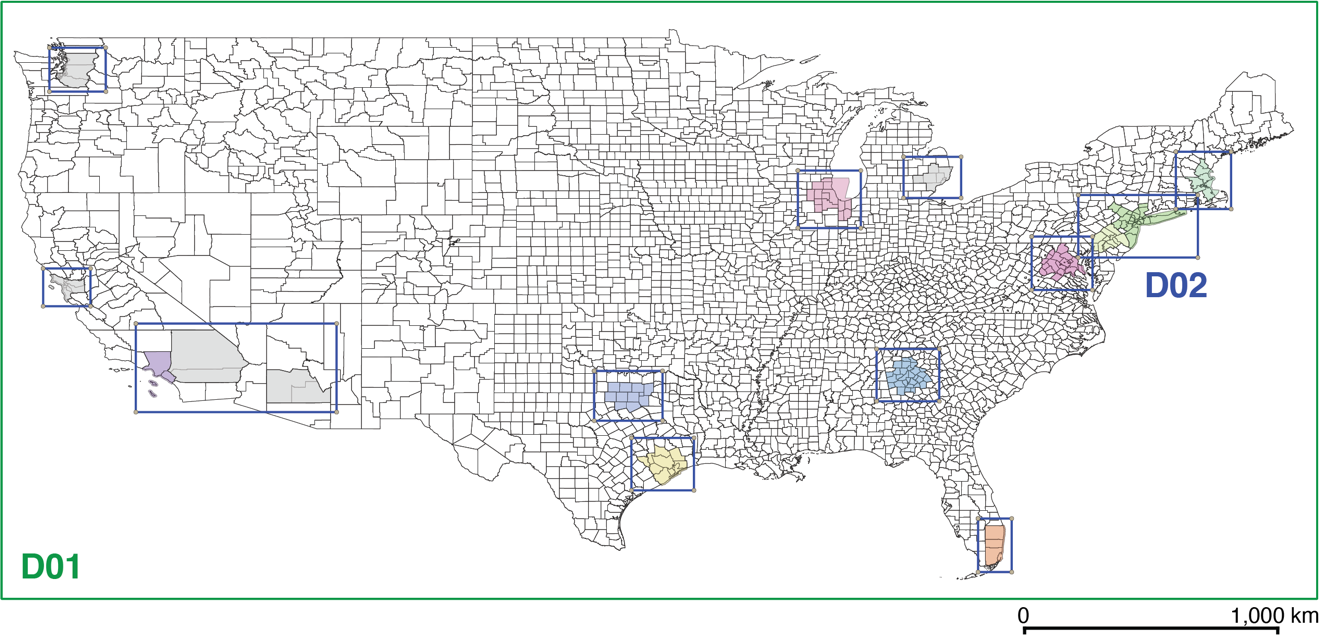


**Supplementary Figure 13 | Nested simulation domains in this study.** The red rectangle represents the first domain (D01), covering the continental United States with a 9-km resolution, while the 12 blue rectangles indicate 12 nested domains covering 15 cities with a 1-km resolution (D02).


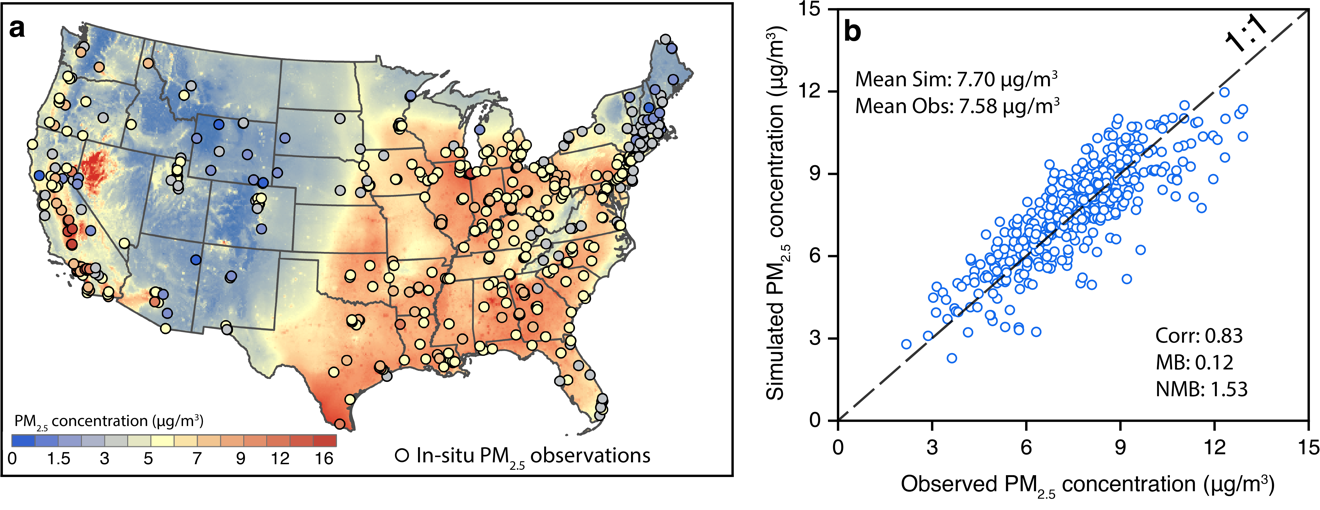


**Supplementary Figure 14 | Evaluations of base-year national PM2.5 air quality simulation.** Panel **a** shows the spatial pattern of simulated ambient PM2.5 concentrations in the 9-km domain, along with surface in-situ PM2.5 observations from NAAQS. Panel **b** compares the annual mean PM2.5 simulations with in-situ observations in 2019 by sites. Statistics of mean simulations (Mean Sim), observations (Mean Obs), correlation coefficient (Corr), mean bias (MB), and normalized mean bias (NMB) were listed.


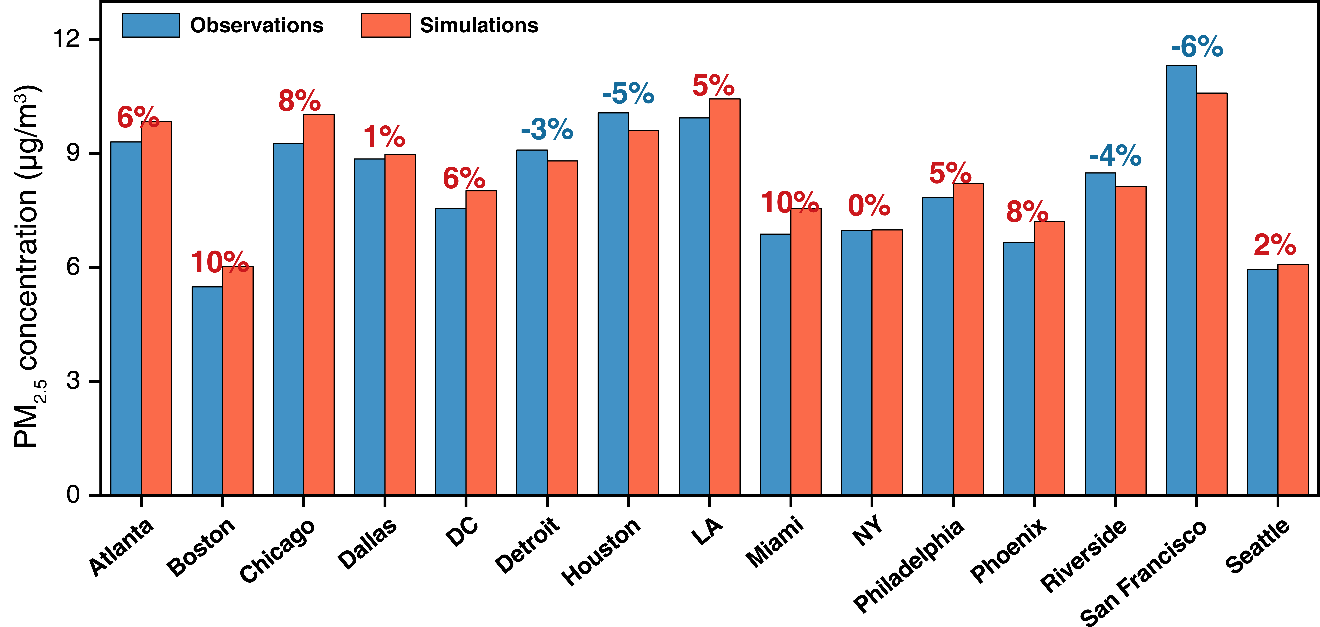


**Supplementary Figure 15 | Evaluations of 2019 base-year PM2.5 air quality simulation in 15 cities.** The red and blue numbers represent the relative errors of overestimation and underestimation, respectively.


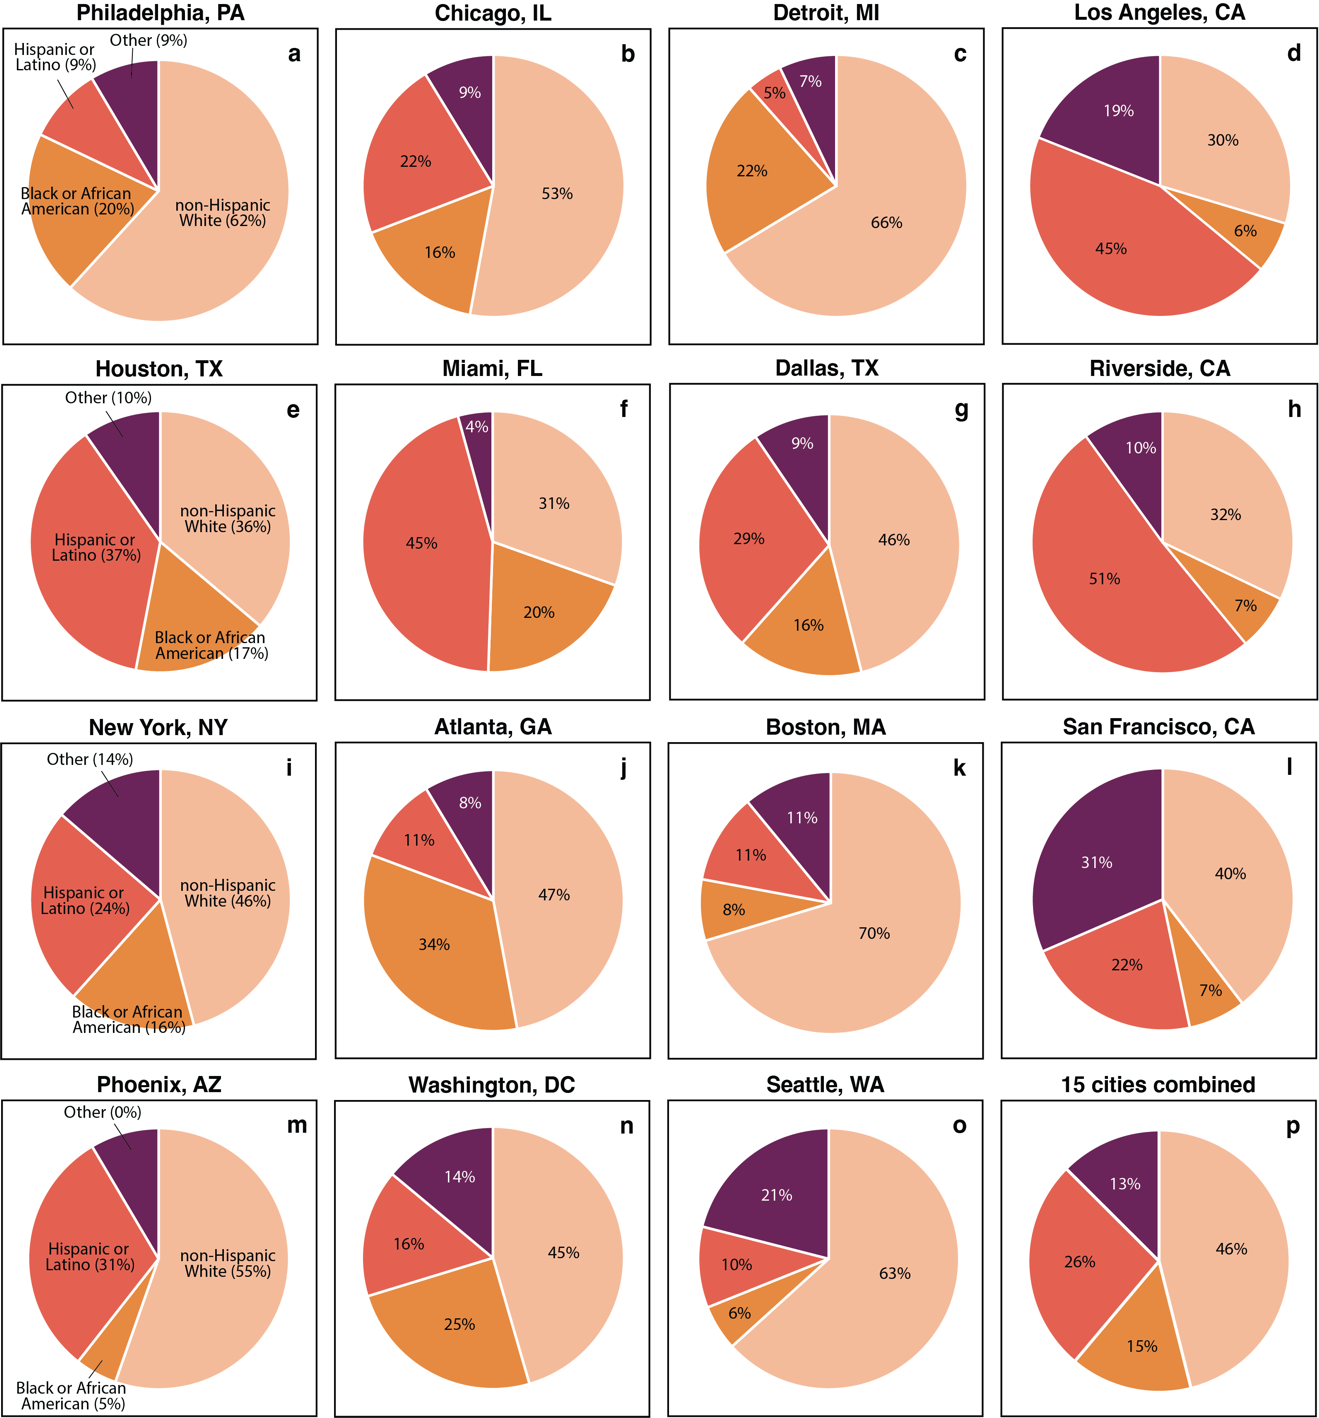


**Supplementary Figure 16 | 2019 race-ethnicity distribution by city.** Each panel represents the race-ethnicity breakdown in each city with data from table ACSDT5Y2019.B03002 from ACS census data. Categories represent “Hispanic or Latino”, “not Hispanic or Latino, White alone”, “not Hispanic or Latino, Black or African American alone”. The other category in the graph includes: “not Hispanic or Latino, American Indian and Alaska Native alone”, “not Hispanic or Latino, Asian alone”, “not Hispanic or Latino, Native Hawaiian and Other Pacific Islander alone”, “not Hispanic or Latino, some other race alone”, “not Hispanic or Latino, two or more races”.


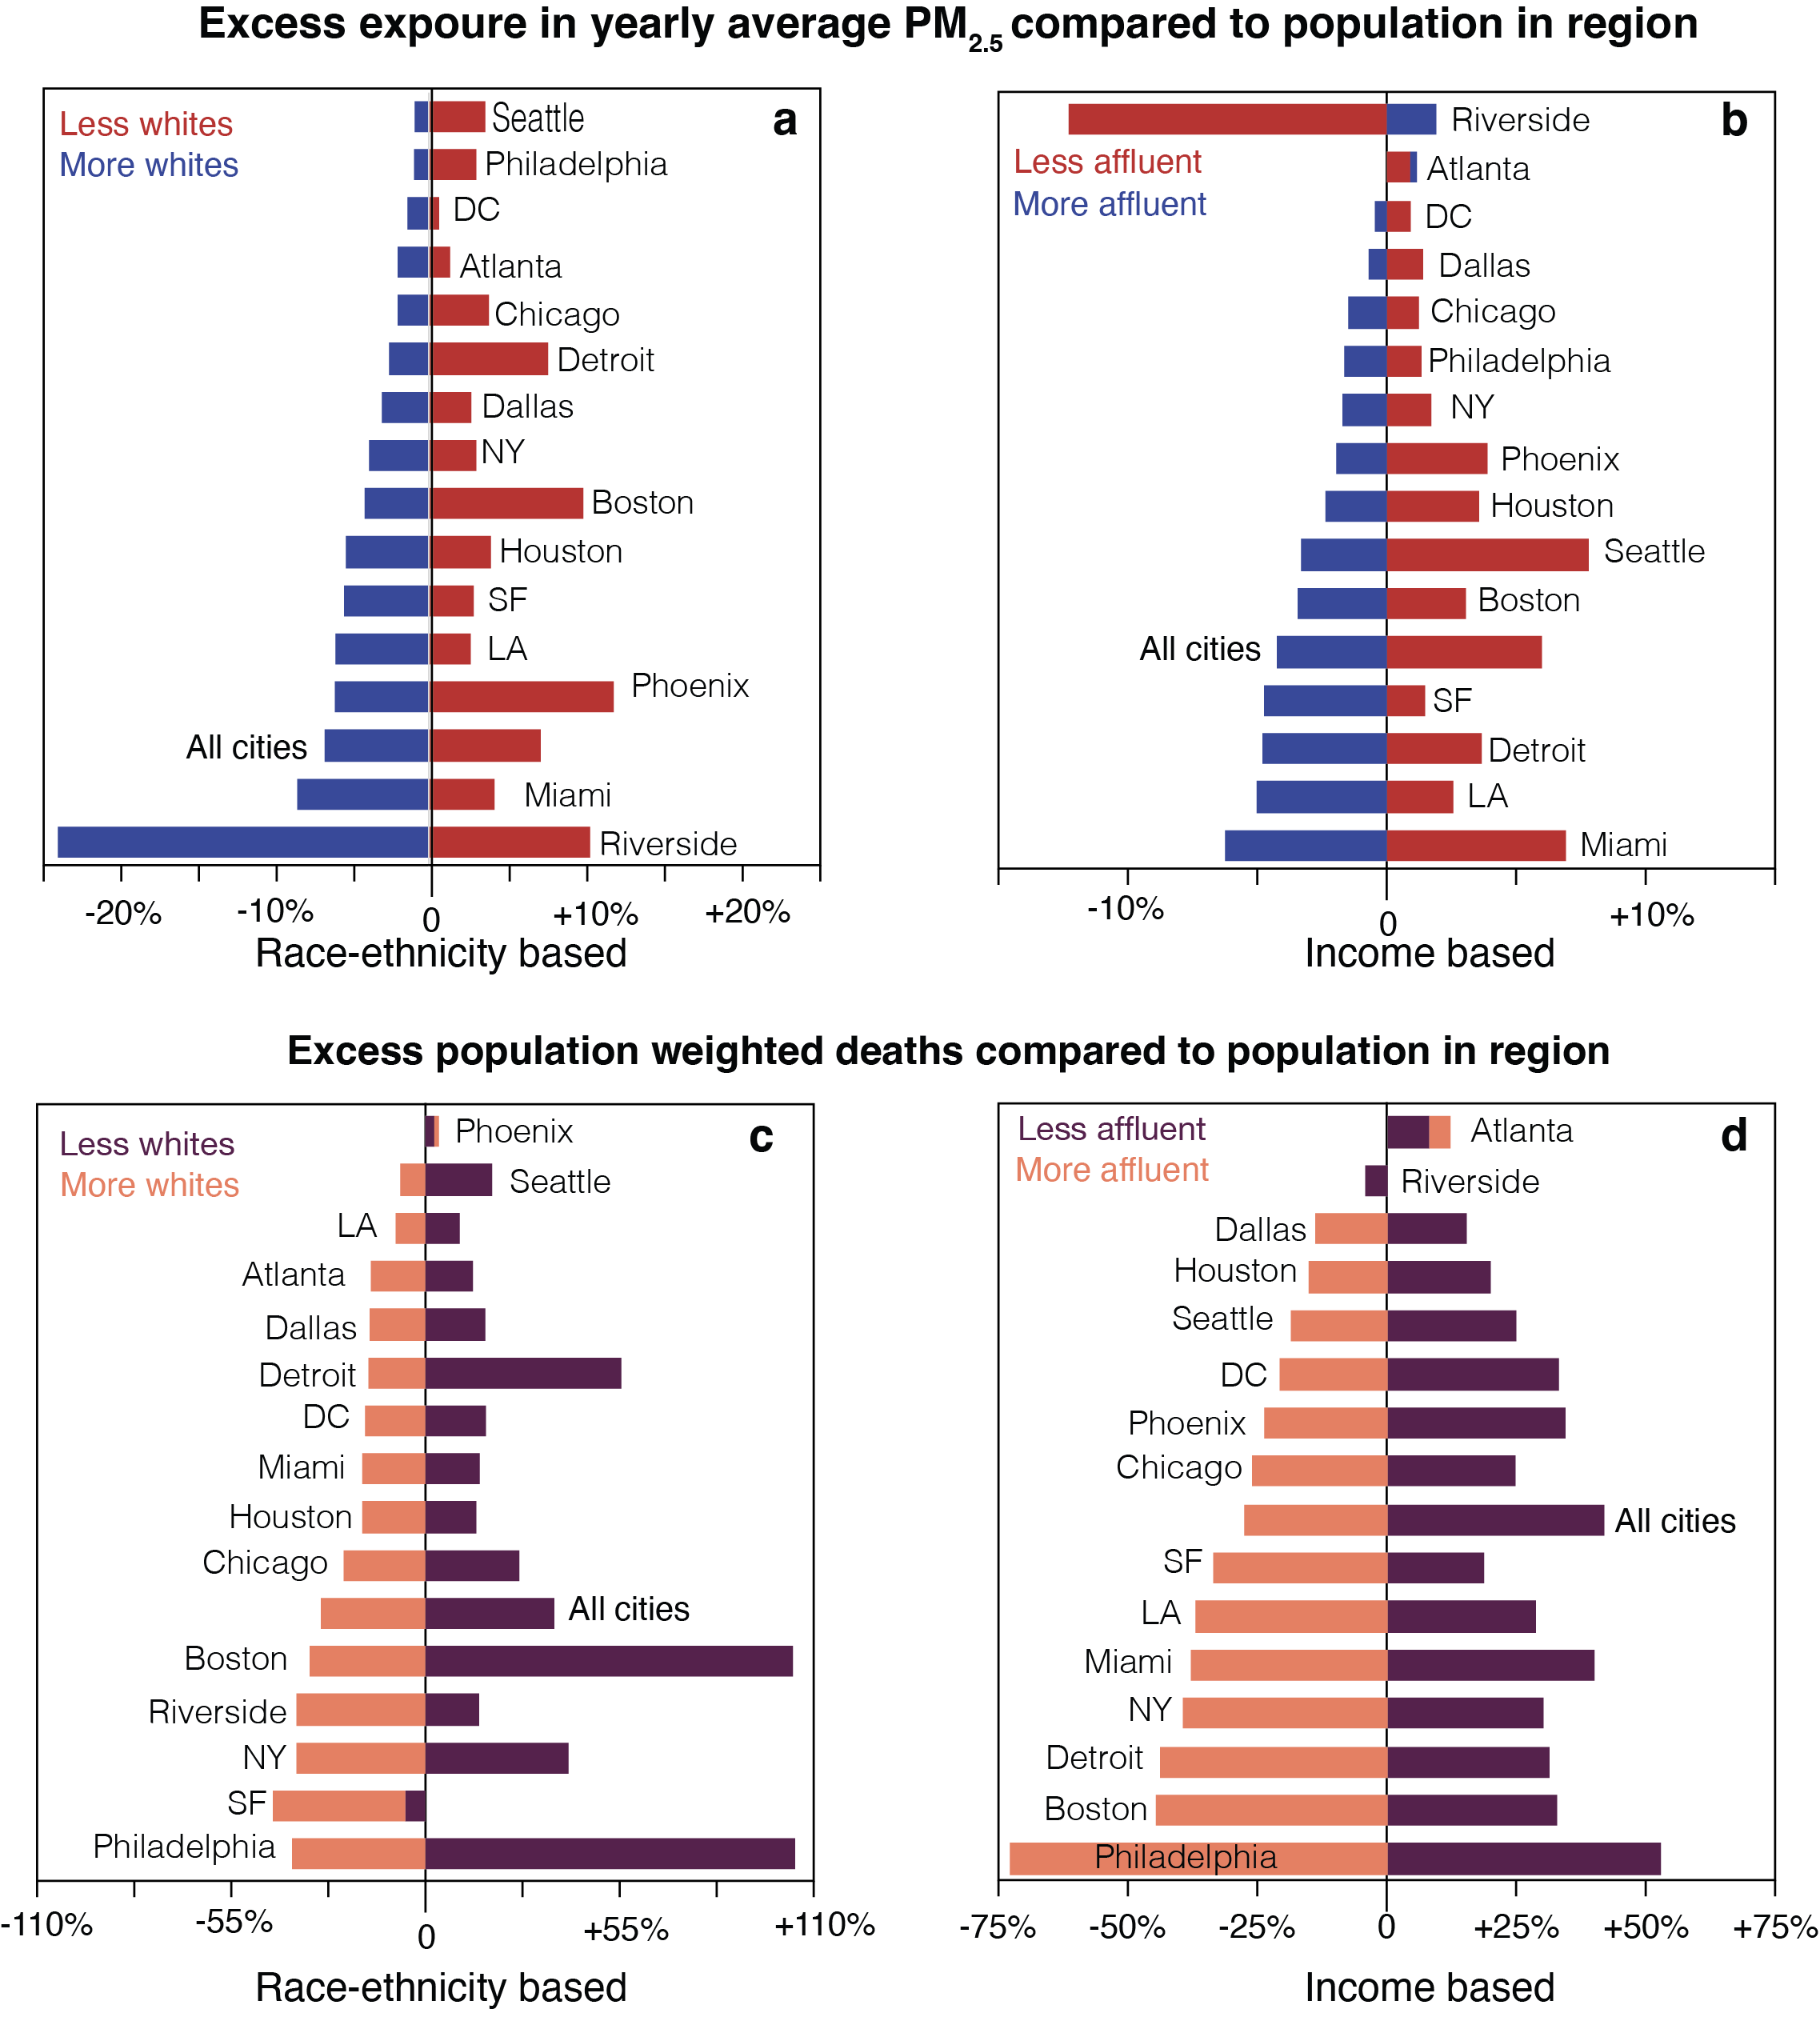


**Supplementary Figure 17 | Excess exposure in each city for population-weighted PM2.5 and mortality in 2019.** Panels (**a** and **b**) represent excess exposure in terms of yearly mean population weighted PM2.5 concentrations, while panels (**c** and **d**) represent excess exposure in terms of population weighted mortality. Excess exposure is the percentage for a given group over or below the value for the entire city. “More whites” refers to regions with >60% non-Hispanic whites, while less white refers to regions in the city with <30% non-Hispanic whites. “More affluent” refers to regions where the median household income is higher than the 66th percentile in that city, while “less affluent” refers to region where the median household income is lower than the 33rd percentile. “All cities” refers to the excess exposure across the 15 cities combined.

**Supplementary Table 1 | The three scenarios of this study**

| **Scenario** | **Policy in the U.S.** | **Carbon storage cost** |
| --- | --- | --- |
| Reference | Default GCAM | Not applicable |
| Net-zero, High-CDR | NDC to 2030 & Net-zero GHG by 2050 | Unrestricted |
| Net-zero, Low-CDR | NDC to 2030 & Net-zero GHG by 2050 | Restricted |

**Supplementary Table 2 | Scenario outputs for 2050 for different variables in GCAM**

|  |  | **Reference** | **Net-zero, High-CDR** | **Net-zero, Low-CDR** |
| --- | --- | --- | --- | --- |
| Primary energy consumption in EJ | Natural gas | 31.3 | 20.9 | 10.8 |
| Oil | 15.4 | 10 | 5.6 |
| Coal | 6.4 | 4.6 | 0.3 |
| Biomass | 8.2 | 26.6 | 15.8 |
| Wind | 5.1 | 9.6 | 15.3 |
| Solar | 4.5 | 8.9 | 14.3 |
| Hydropower | 1 | 1 | 1 |
| Nuclear | 1 | 3 | 8.2 |
| Total | 72.9 | 84.6 | 71.3 |
|  |  |  |  |  |
| Final energy in buildings in EJ | Refined liquids | 0.9 | 0.7 | 0.5 |
| Natural gas | 6.9 | 3.9 | 2.5 |
| Biomass | 0.5 | 0.2 | 0.1 |
| Electricity | 14.1 | 15.2 | 15.8 |
| Total | 22.4 | 20 | 18.9 |
|  |  |  |  |  |
| Final energy in industry in EJ | Refined liquids | 10.2 | 9.4 | 8.1 |
| Natural gas | 11.2 | 10.2 | 4.6 |
| Biomass | 2.1 | 1.4 | 0.8 |
| Electricity | 6.1 | 8.1 | 11.1 |
| Coal | 1.9 | 0.5 | 0.1 |
| Hydrogen | 0.1 | 0.3 | 0.3 |
| Total | 31.6 | 29.9 | 25 |
|  |  |  |  |  |
| Final energy in transport in EJ | Refined liquids | 20.6 | 13.5 | 6.5 |
| Natural gas | 0 | 0 | 0 |
| Electricity | 2.8 | 4.4 | 7.2 |
| Hydrogen | 1.2 | 1.8 | 2.3 |
|  | Total | 24.6 | 19.7 | 16 |
|  |  |  |  |  |
| Electricity generation by source in EJ | Natural gas | 11.8 | 5.6 | 1.4 |
| Oil | 0 | 0 | 0 |
| Coal | 2 | 1.6 | 0.1 |
| Biomass | 0.2 | 1.5 | 0.3 |
| Wind | 5.1 | 9.5 | 14.6 |
| Solar | 4.3 | 8.3 | 13.4 |
| rooftop PV | 0.2 | 0.6 | 0.6 |
| Hydro | 1 | 1 | 1 |
| Nuclear | 1 | 2.9 | 7.4 |
| Geothermal | 0.1 | 0.1 | 0.1 |
| Total | 25.7 | 31.1 | 38.9 |
|  |  |  |  |  |
| Refined liquids by technology in EJ | Oil | 26.1 | 12.6 | 7.2 |
| Natural gas | 1.1 | 0 | 0 |
| Coal | 0 | 0 | 0 |
| Biodiesel | 0.4 | 0.3 | 0.4 |
| Corn ethanol (no CCS) | 2.1 | 1.2 | 0.8 |
| Cellulosic ethanol (no CCS) | 1.5 | 0 | 0 |
| Cellulosic ethanol (with CCS) | 0 | 5.9 | 3.8 |
| FT biofuel (no CCS) | 0.4 | 0 | 0 |
| FT biofuel (with CCS) | 0 | 3.5 | 2.9 |
| BTL with H2 (no CCS) | 0 | 0 | 0 |
| Total | 31.6 | 23.5 | 15.1 |
|  |  |  |  |  |
| Purpose-grown biomass production in EJ | | 5.4 | 6.7 | 2.8 |
|  |  |  |  |  |
| Land allocation by type in thousand km | Agriculture | 1118.8 | 685.5 | 565.9 |
| Other arable land | 321.8 | 260.4 | 262.8 |
| Biomass | 240.7 | 281.9 | 138.8 |
| Forest | 1915.2 | 2179.5 | 2335.4 |
| Foder | 238.8 | 136.3 | 106.0 |
| Grassland | 599.9 | 737.8 | 765.5 |
| Pasture | 1640.5 | 1813.3 | 1923.5 |
| Shrubland | 268.3 | 249.2 | 246.1 |
| Protected land | 2120.3 | 2120.3 | 2120.3 |
| Total | 8464.2 | 8464.2 | 8464.2 |
|  |  |  |  |  |
| Food consumption in Pcal/yr | Staples | 165.7 | 165.7 | 165.6 |
| Non-staples | 388.5 | 383.9 | 381.5 |
| Total | 554.3 | 549.6 | 547.2 |
|  |  |  |  |  |
| Water withdrawals for irrigation in km3 | Corn | 51.0 | 33.9 | 26.8 |
| Fiber Crop | 16.1 | 10.3 | 8.5 |
| Fodder Herb | 7.9 | 3.2 | 1.9 |
| Fruits | 8.8 | 8.3 | 7.9 |
| Legumes | 2.2 | 1.1 | 0.8 |
| Miscellaneous Crop | 0.1 | 0.1 | 0.1 |
| Nuts Seeds | 8.7 | 5.5 | 4.4 |
| Oil Crop | 1.1 | 0.7 | 0.6 |
| Other Grain | 4.7 | 3.7 | 3.3 |
| Rice | 15.1 | 8.5 | 7.0 |
| Root Tuber | 3.4 | 3.4 | 3.2 |
| Soybean | 16.8 | 7.6 | 6.3 |
| Sugar Crop | 3.5 | 3.9 | 4.1 |
| Vegetables | 4.9 | 4.9 | 4.7 |
| Wheat | 8.6 | 4.9 | 3.7 |
| biomass | 14.6 | 18.1 | 6.1 |
| Total | 167.7 | 118.2 | 89.4 |
|  |  |  |  |  |
| Final energy in industry by sector in EJ | CO2 removal | 0.00 | 0.71 | 0.00 |
| Nitrogen fertilizer | 0.57 | 0.42 | 0.27 |
| Cement | 0.07 | 0.04 | 0.03 |
| Other industrial energy use | 21.83 | 18.88 | 17.09 |
| Other industrial feedstocks | 8.58 | 7.68 | 7.36 |
| Process heat cement | 0.53 | 0.32 | 0.23 |
| Process heat DAC | 0.00 | 1.94 | 0.00 |

**Supplementary Table 3 | Industry final energy by technology and fuel in EJ in 2050 from GCAM**

| **Sector** | **Subsector** | **Technology** | **Reference** | **Net-zero, High-CDR** | **Net-zero, Low-CDR** |
| --- | --- | --- | --- | --- | --- |
| Cement | Cement | Cement | 0.0724 | 0.0018 | 0.0107 |
| Cement | Cement | Cement CCS | 0.0000 | 0.0413 | 0.0215 |
| CO2 removal | DAC | High temp DAC NG | 0.0000 | 0.4699 | 0.0000 |
| CO2 removal | DAC | High temp DAC elec | 0.0000 | 0.0127 | 0.0000 |
| CO2 removal | DAC | Low temp DAC heat pump | 0.0000 | 0.2271 | 0.0001 |
| N fertilizer | gas | gas | 0.5715 | 0.0354 | 0.1088 |
| N fertilizer | gas | gas CCS | 0.0000 | 0.3865 | 0.1587 |
| other industrial energy use | biomass | biomass | 1.4475 | 0.9720 | 0.5868 |
| other industrial energy use | biomass | biomass cogen | 0.6762 | 0.4250 | 0.1968 |
| other industrial energy use | coal | coal | 1.2214 | 0.3971 | 0.0422 |
| other industrial energy use | coal | coal cogen | 0.2215 | 0.0676 | 0.0063 |
| other industrial energy use | electricity | electricity | 6.0443 | 7.3795 | 11.0646 |
| other industrial energy use | gas | gas | 8.5015 | 6.5959 | 3.7902 |
| other industrial energy use | gas | gas cogen | 1.4936 | 1.1968 | 0.4817 |
| other industrial energy use | hydrogen | hydrogen | 0.0414 | 0.0834 | 0.1047 |
| other industrial energy use | hydrogen | hydrogen cogen | 0.0472 | 0.1918 | 0.1852 |
| other industrial energy use | refined liquids | refined liquids | 2.0322 | 1.5198 | 0.6168 |
| other industrial energy use | refined liquids | refined liquids cogen | 0.1080 | 0.0502 | 0.0129 |
| other industrial feedstocks | gas | gas | 0.6273 | 0.0891 | 0.0399 |
| other industrial feedstocks | refined liquids | refined liquids | 7.9573 | 7.5886 | 7.3199 |
| process heat cement | biomass | biomass | 0.0070 | 0.0057 | 0.0056 |
| process heat cement | coal | coal | 0.4096 | 0.0223 | 0.0115 |
| process heat cement | gas | gas | 0.0153 | 0.0094 | 0.0068 |
| process heat cement | hydrogen | hydrogen | 0.0011 | 0.0110 | 0.0129 |
| process heat cement | refined liquids | refined liquids | 0.0964 | 0.2678 | 0.1981 |
| process heat DAC | gas CCS | gas CCS | 0.0000 | 1.9361 | 0.0000 |

**Supplementary Table 4 | PM2.5 emissions in Mt in 2050 in the US by aggregate sector and technology**

| **Sector** | **Technology** | **Reference** | **Net-zero, High-CDR** | **Net-zero, Low-CDR** |
| --- | --- | --- | --- | --- |
| Buildings (commercial) | fuel furnace | 0.00035 | 0.00030 | 0.00015 |
| Buildings (commercial) | fuel water heater | 0.00005 | 0.00007 | 0.00004 |
| Buildings (commercial) | gas | 0.00181 | 0.00128 | 0.00087 |
| Buildings (commercial) | gas cooling | 0.00005 | 0.00004 | 0.00003 |
| Buildings (commercial) | gas furnace | 0.00148 | 0.00052 | 0.00025 |
| Buildings (commercial) | gas furnace hi-eff | 0.00136 | 0.00068 | 0.00035 |
| Buildings (commercial) | gas range | 0.00017 | 0.00008 | 0.00004 |
| Buildings (commercial) | gas range hi-eff | 0.00027 | 0.00018 | 0.00012 |
| Buildings (commercial) | gas water heater | 0.00039 | 0.00019 | 0.00010 |
| Buildings (commercial) | gas water heater hi-eff | 0.00074 | 0.00044 | 0.00024 |
| Buildings (commercial) | refined liquids | 0.00213 | 0.00152 | 0.00099 |
| Buildings (commercial) | wood furnace | 0.01636 | 0.00435 | 0.00289 |
| Buildings (residential) | clothes dryer | 0.00005 | 0.00003 | 0.00002 |
| Buildings (residential) | fuel furnace | 0.00067 | 0.00065 | 0.00053 |
| Buildings (residential) | fuel furnace hi-eff | 0.00022 | 0.00026 | 0.00018 |
| Buildings (residential) | fuel water heater | 0.00020 | 0.00014 | 0.00007 |
| Buildings (residential) | fuel water heater hi-eff | 0.00005 | 0.00008 | 0.00007 |
| Buildings (residential) | gas | 0.00021 | 0.00014 | 0.00009 |
| Buildings (residential) | gas furnace | 0.00115 | 0.00063 | 0.00048 |
| Buildings (residential) | gas furnace hi-eff | 0.00054 | 0.00038 | 0.00025 |
| Buildings (residential) | gas oven | 0.00010 | 0.00006 | 0.00003 |
| Buildings (residential) | gas oven hi-eff | 0.00007 | 0.00005 | 0.00003 |
| Buildings (residential) | gas water heater | 0.00134 | 0.00081 | 0.00048 |
| Buildings (residential) | gas water heater hi-eff | 0.00020 | 0.00033 | 0.00033 |
| Buildings (residential) | lpg oven | 0.00003 | 0.00002 | 0.00001 |
| Buildings (residential) | lpg oven hi-eff | 0.00002 | 0.00002 | 0.00001 |
| Buildings (residential) | refined liquids | 0.00010 | 0.00007 | 0.00004 |
| Buildings (residential) | wood furnace | 0.18022 | 0.07374 | 0.06473 |
| Cement^ | cement | 0.01092 | 0.00027 | 0.00161 |
| Electricity | biomass (conv) (cooling pond) | 0.00007 | 0.00001 | 0.00001 |
| Electricity | biomass (conv) (dry cooling) | 0.00067 | 0.00005 | 0.00004 |
| Electricity | biomass (conv) (once through) | 0.00006 | 0.00000 | 0.00000 |
| Electricity | biomass (conv) (recirculating) | 0.00882 | 0.00071 | 0.00066 |
| Electricity | biomass (conv) (seawater) | 0.00008 | 0.00001 | 0.00001 |
| Electricity | biomass (IGCC) (dry cooling) | 0.00001 | 0.00000 | 0.00000 |
| Electricity | biomass (IGCC) (recirculating) | 0.00001 | 0.00000 | 0.00000 |
| Electricity | biomass (IGCC) (seawater) | 0.00000 | 0.00000 | 0.00000 |
| Electricity | coal (conv pul) (cooling pond) | 0.00675 | 0.00001 | 0.00000 |
| Electricity | coal (conv pul) (dry cooling) | 0.00007 | 0.00000 | 0.00000 |
| Electricity | coal (conv pul) (once through) | 0.01187 | 0.00002 | 0.00000 |
| Electricity | coal (conv pul) (recirculating) | 0.01924 | 0.00002 | 0.00000 |
| Electricity | coal (conv pul) (seawater) | 0.00090 | 0.00000 | 0.00000 |
| Electricity | gas (CC) (cooling pond) | 0.00059 | 0.00008 | 0.00002 |
| Electricity | gas (CC) (dry cooling) | 0.00061 | 0.00008 | 0.00002 |
| Electricity | gas (CC) (once through) | 0.00026 | 0.00004 | 0.00001 |
| Electricity | gas (CC) (recirculating) | 0.00496 | 0.00069 | 0.00016 |
| Electricity | gas (CC) (seawater) | 0.00046 | 0.00006 | 0.00001 |
| Electricity | gas (steam/CT) (cooling pond) | 0.00006 | 0.00001 | 0.00000 |
| Electricity | gas (steam/CT) (dry cooling) | 0.00001 | 0.00000 | 0.00000 |
| Electricity | gas (steam/CT) (once through) | 0.00009 | 0.00000 | 0.00000 |
| Electricity | gas (steam/CT) (recirculating) | 0.00017 | 0.00002 | 0.00001 |
| Electricity | gas (steam/CT) (seawater) | 0.00004 | 0.00000 | 0.00000 |
| Electricity | refined liquids (steam/CT) (cooling pond) | 0.00000 | 0.00000 | 0.00000 |
| Electricity | refined liquids (steam/CT) (dry cooling) | 0.00000 | 0.00000 | 0.00000 |
| Electricity | refined liquids (steam/CT) (once through) | 0.00004 | 0.00001 | 0.00000 |
| Electricity | refined liquids (steam/CT) (recirculating) | 0.00002 | 0.00000 | 0.00000 |
| Electricity | refined liquids (steam/CT) (seawater) | 0.00001 | 0.00000 | 0.00000 |
| Electricity (BECCS) | biomass (conv CCS) (dry cooling) | 0.00000 | 0.00770 | 0.00075 |
| Electricity (BECCS) | biomass (conv CCS) (recirculating) | 0.00000 | 0.07038 | 0.00763 |
| Electricity (BECCS) | biomass (conv CCS) (seawater) | 0.00000 | 0.00051 | 0.00006 |
| Electricity (BECCS) | biomass (IGCC CCS) (dry cooling) | 0.00000 | 0.00005 | 0.00001 |
| Electricity (BECCS) | biomass (IGCC CCS) (recirculating) | 0.00000 | 0.00005 | 0.00001 |
| Electricity (BECCS) | biomass (IGCC CCS) (seawater) | 0.00000 | 0.00002 | 0.00001 |
| Electricity (CCS) | coal (conv pul CCS) (dry cooling) | 0.00000 | 0.00967 | 0.00042 |
| Electricity (CCS) | coal (conv pul CCS) (recirculating) | 0.00000 | 0.01075 | 0.00046 |
| Electricity (CCS) | coal (conv pul CCS) (seawater) | 0.00000 | 0.00331 | 0.00016 |
| Electricity (CCS) | coal (IGCC CCS) (dry cooling) | 0.00000 | 0.03860 | 0.00206 |
| Electricity (CCS) | coal (IGCC CCS) (recirculating) | 0.00000 | 0.04203 | 0.00228 |
| Electricity (CCS) | coal (IGCC CCS) (seawater) | 0.00000 | 0.01332 | 0.00078 |
| Electricity (CCS) | gas (CC CCS) (dry cooling) | 0.00000 | 0.00007 | 0.00001 |
| Electricity (CCS) | gas (CC CCS) (recirculating) | 0.00000 | 0.00059 | 0.00012 |
| Electricity (CCS) | gas (CC CCS) (seawater) | 0.00000 | 0.00004 | 0.00001 |
| Industry (energy use) | biomass | 0.07591 | 0.05923 | 0.03526 |
| Industry (energy use) | biomass cogen | 0.04927 | 0.03114 | 0.01471 |
| Industry (energy use) | coal | 0.02508 | 0.00538 | 0.00054 |
| Industry (energy use) | coal cogen | 0.00243 | 0.00066 | 0.00005 |
| Industry (energy use) | gas | 0.04047 | 0.03167 | 0.01810 |
| Industry (energy use) | gas cogen | 0.00732 | 0.00589 | 0.00239 |
| Industry (energy use) | refined liquids | 0.11587 | 0.08090 | 0.02878 |
| Industry (energy use) | refined liquids cogen | 0.00744 | 0.00307 | 0.00070 |
| Industry (processes) | other industrial processes | 0.45202 | 0.40215 | 0.38401 |
| Industry (processes) | solvents | 0.00443 | 0.00390 | 0.00372 |
| Refining | biodiesel | 0.00000 | 0.00000 | 0.00000 |
| Refining | corn ethanol | 0.00065 | 0.00043 | 0.00028 |
| Refining | oil refining | 0.01155 | 0.00557 | 0.00320 |
| Transportation | BEV | 0.00896 | 0.01047 | 0.01413 |
| Transportation | FCEV | 0.00215 | 0.00238 | 0.00250 |
| Transportation | Hybrid Liquids | 0.01323 | 0.01043 | 0.00614 |
| Transportation | Liquids | 0.06947 | 0.03118 | 0.01365 |
| Transportation | NG | 0.00001 | 0.00001 | 0.00001 |
| Urban processes* | landfills | 0.00516 | 0.00516 | 0.00516 |
| Urban processes* | waste_incineration | 0.07103 | 0.07103 | 0.07103 |
| Urban processes* | wastewater | 0.00012 | 0.00012 | 0.00012 |
| Resource production* | Crude oil | 0.00375 | 0.00336 | 0.00189 |
| Resource production* | Natural gas | 0.00821 | 0.00549 | 0.00284 |

^Grouped into “industry (energy)” in Figure 1

*Grouped in “other” in Figure 1

**Supplementary Table 5 |** **Carbon storage costs in GCAM in 2023$/tCO2.** We restrict CDR by artificially inflating the costs of sequestering carbon in the model

| **Scenario** | **2015** | **2030** | **2050** |
| --- | --- | --- | --- |
| Net-zero, high-CDR | 8.36 | 16.55 | 18.58 |
| Net-zero, low-CDR | 624.10 | 629.36 | 620.64 |

**Supplementary Table 6 | The 15 Metropolitan Statistical Areas (MSA**). First column has the MSA name (in parenthesis how we refer to them in the manuscript). Second column includes the counties within that MSA. Third column has population in 2019 from census data (ACSDT5Y2019.B01003).

| **MSA name** | **Counties** | **Population** |
| --- | --- | --- |
| Atlanta–Sandy Springs–Roswell, GA  (Atlanta) | Haralson, Carroll, Heard, Bartow, Paulding, Douglas, Coweta, Meriwether, Pickens, Cherokee, Cobb, Fulton, Fayette, Spalding, Pike, Dawson, Forsyth, Gwinnett, DeKalb, Clayton, Henry, Butts, Lamar, Rockdale, Barrow, Walton, Newton, Morgan, Jasper | 5,862,424 |
| Boston–Cambridge–Newton, MA-NH  (Boston) | Strafford, Rockingham, Suffolk, Norfolk, Essex, Plymouth, Middlesex | 4,832,346 |
| Chicago–Naperville–Elgin, IL-IN  (Chicago) | Lake, Will, Cook, DuPage, Kendall, Kane, DeKalb, Grundy, McHenry, Jasper, Porter, Newton, Lake, Kenosha. | 9,508,605 |
| Dallas–Fort Worth–Arlington, TX  (Dallas) | Wise, Denton, Collin, Hunt, Parker, Tarrant, Dallas, Rockwall, Johnson, Ellis, Kaufman | 7,320,663 |
| Detroit–Warren–Dearborn, MI  (Detroit) | Wayne, St. Clair, Macomb, Oakland, Lapeer, Livingston | 4,317,848 |
| Houston–Pasadena–The Woodlands, TX  (Houston) | Austin, Waller, Montgomery, Fort Bend, Harris, Chambers, Galveston, Brazoria, Liberty | 6,884,138 |
| Los Angeles–Long Beach–Anaheim, CA  (Los Angeles) | Los Angeles, Orange | 13,249,614 |
| Miami–Fort Lauderdale–West Palm Beach, FL  (Miami) | Palm Beach, Broward, Miami Dade | 6,090,660 |
| New York–Newark–Jersey City, NY-NJ  (New York) | Pike, Sussex, Essex, Passaic, Somerset, Morris, Middlesex, Bergen, Ocean, Hudson, Union, Monmouth, Hunterdon, Westchester, Queens, Kings, New York, Bronx, Richmond, Rockland, Nassau, Suffolk, Putnam | 19,294,236 |
| Philadelphia–Camden–Wilmington, PA-NJ-DE-MD  (Philadelphia) | Philadelphia, Chester, Delaware, Bucks, Montgomery, New Castle, Camden, Gloucester, Burlignton, Salem, Cecil | 6,079,130 |
| Phoenix–Mesa–Chandler, AZ  (Phoenix) | Maricopa, Pinal | 4,761,603 |
| Riverside–San Bernardino–Ontario, CA  (Riverside) | San Bernardino, Riverside | 4,560,470 |
| San Francisco–Oakland–Fremont, CA  (San Francisco) | Alameda, Contra Costa, Marin, San Mateo, San Francisco | 4,701,332 |
| Seattle–Tacoma–Bellevue, WA  (Seattle) | Pierce, King, Snohomish | 3,871,323 |
| Washington–Arlington–Alexandria, DC-VA-MD-WV  (D.C.) | Frederick, Charles, Montgomery, Prince Georges, Calvert, Fairfax, Fauquier, Prince William, Stafford, Fairfax, Loudon, Culpeper, Clarke, Alexandria, Falls Church, Arlington, Manassas, Manasas Park, Warren, Rappahannock, Madison, Spotsylvania, Fredericksburg, D.C., Jefferson | 6,196,585 |

**Supplementary Table 7 *|*****City-average PM2.5 pollution and related mortality in 2050**. Population-weighted PM2.5 concentrations (µg/m3) and population weighted mortality in the 15 most populous U.S. cities.

|  | **PM2.5 concentrations** | | **PM2.5-deaths** | |
| --- | --- | --- | --- | --- |
| **high-CDR** | **low-CDR** | **high-CDR** | **low-CDR** |
| **All 15 cities combined** | 6.09 | 4.73 | 1.59 | 1.24 |
| Atlanta | 6.52 | 5.19 | 0.37 | 0.3 |
| Boston | 4.82 | 3.71 | 1.01 | 0.78 |
| Chicago | 7.13 | 5.56 | 1.62 | 1.28 |
| Dallas | 6.65 | 5.04 | 0.64 | 0.49 |
| D.C. | 5.71 | 4.56 | 0.81 | 0.65 |
| Detroit | 6.07 | 4.82 | 0.89 | 0.71 |
| Houston | 7.07 | 5.37 | 0.69 | 0.53 |
| Los Angeles | 7.94 | 6.23 | 2.12 | 1.68 |
| Miami | 5.11 | 3.9 | 1.17 | 0.9 |
| New York | 5.05 | 3.87 | 3.58 | 2.77 |
| Philadelphia | 5.79 | 4.45 | 1.5 | 1.16 |
| Phoenix | 5.21 | 4.09 | 0.61 | 0.48 |
| Riverside | 6.76 | 5.31 | 0.76 | 0.6 |
| San Francisco | 5.51 | 4.26 | 1.73 | 1.35 |
| Seattle | 4.18 | 3.27 | 0.57 | 0.45 |

**Supplementary Table 8 *|* High-CDR scenario population-weighted PM2.5 pollution in 2050.** Population weighted pollution (µg/m3) for each bin across the 15 cities based on race-ethnicity and median household income

|  | **2050 High-CDR** | | | | | |
| --- | --- | --- | --- | --- | --- | --- |
| Percent non-Hispanic white | | | Median household income percentile | | |
| 0-30% | 31-60% | 61-100% | 0-33rd | 33-66th | 66-100th |
| **All 15 cities combined** | 6.52 | 6.06 | 5.64 | 6.39 | 6.18 | 5.87 |
| Atlanta | 6.60 | 6.59 | 6.40 | 6.57 | 6.43 | 6.53 |
| Boston | 5.24 | 5.23 | 4.64 | 4.93 | 4.72 | 4.69 |
| Chicago | 7.36 | 7.16 | 7.00 | 7.23 | 7.1 | 7.03 |
| Dallas | 6.81 | 6.67 | 6.46 | 6.73 | 6.59 | 6.61 |
| D.C. | 5.75 | 5.75 | 5.64 | 5.76 | 5.71 | 5.69 |
| Detroit | 6.48 | 6.22 | 5.93 | 6.26 | 5.9 | 5.83 |
| Houston | 7.33 | 6.94 | 6.74 | 7.29 | 7 | 6.92 |
| Los Angeles | 8.10 | 7.74 | 7.69 | 8.07 | 7.97 | 7.67 |
| Miami | 5.28 | 4.90 | 4.81 | 5.31 | 5.09 | 4.85 |
| New York | 5.18 | 5.12 | 4.88 | 5.13 | 4.94 | 4.97 |
| Philadelphia | 5.96 | 5.77 | 5.74 | 5.86 | 5.72 | 5.71 |
| Phoenix | 5.78 | 5.32 | 4.91 | 5.37 | 5.22 | 5.12 |
| Riverside | 7.41 | 6.20 | 5.25 | 6.06 | 6.38 | 6.87 |
| San Francisco | 5.62 | 5.56 | 5.20 | 5.6 | 5.52 | 5.31 |
| Seattle | 4.29 | 4.18 | 4.18 | 4.42 | 4.19 | 4.06 |

**Supplementary Table 9 |High-CDR scenario population-weighted PM2.5 mortality in 2050.** Population weighted mortality for each bin across the 15 cities based on race-ethnicity and median household income

|  | **2050 High-CDR** | | | | | |
| --- | --- | --- | --- | --- | --- | --- |
| Percent non-Hispanic white | | | Median household income percentile | | |
| 0-30% | 31-60% | 61-100% | 0-33rd | 33-66th | 66-100th |
| **All 15 cities combined** | 2.17 | 1.46 | 1.1 | 2.27 | 1.72 | 1.15 |
| Atlanta | 0.42 | 0.39 | 0.31 | 0.4 | 0.32 | 0.38 |
| Boston | 2.06 | 1.65 | 0.67 | 1.31 | 0.85 | 0.57 |
| Chicago | 2.06 | 1.88 | 1.24 | 2.02 | 1.43 | 1.22 |
| Dallas | 0.75 | 0.63 | 0.54 | 0.74 | 0.63 | 0.55 |
| D.C. | 0.95 | 0.8 | 0.67 | 1.06 | 0.82 | 0.66 |
| Detroit | 1.38 | 0.96 | 0.74 | 1.15 | 0.71 | 0.51 |
| Houston | 0.8 | 0.63 | 0.57 | 0.82 | 0.67 | 0.59 |
| Los Angeles | 2.32 | 1.73 | 2 | 2.68 | 2 | 1.35 |
| Miami | 1.35 | 0.91 | 0.97 | 1.52 | 1.07 | 0.73 |
| New York | 5.06 | 3.35 | 2.26 | 4.64 | 2.23 | 2.23 |
| Philadelphia | 3.09 | 1.72 | 0.92 | 2.27 | 0.84 | 0.43 |
| Phoenix | 0.62 | 0.59 | 0.62 | 0.79 | 0.76 | 0.47 |
| Riverside | 0.88 | 0.65 | 0.48 | 0.72 | 0.77 | 0.76 |
| San Francisco | 1.62 | 2.25 | 1.06 | 2.06 | 1.68 | 1.17 |
| Seattle | 0.67 | 0.62 | 0.53 | 0.7 | 0.64 | 0.47 |

**Supplementary Table 10 |Low-CDR scenario population-weighted PM2.5 pollution in 2050.** Population weighted pollution (µg/m3) for each bin across the 15 cities based on race-ethnicity and median household income

|  | **2050 Low-CDR** | | | | | |
| --- | --- | --- | --- | --- | --- | --- |
| Percent non-Hispanic white | | | Median household income percentile | | |
| 0-30% | 31-60% | 61-100% | 0-33rd | 33-66th | 66-100th |
| **All 15 cities combined** | 5.06 | 4.71 | 4.38 | 4.95 | 4.8 | 4.56 |
| Atlanta | 5.25 | 5.25 | 5.09 | 5.23 | 5.12 | 5.2 |
| Boston | 4.03 | 4.02 | 3.57 | 3.8 | 3.63 | 3.61 |
| Chicago | 5.74 | 5.58 | 5.45 | 5.63 | 5.53 | 5.48 |
| Dallas | 5.16 | 5.06 | 4.89 | 5.1 | 4.99 | 5 |
| D.C. | 4.58 | 4.59 | 4.5 | 4.59 | 4.55 | 4.54 |
| Detroit | 5.15 | 4.95 | 4.71 | 4.97 | 4.69 | 4.64 |
| Houston | 5.56 | 5.27 | 5.11 | 5.53 | 5.31 | 5.25 |
| Los Angeles | 6.36 | 6.07 | 6.03 | 6.33 | 6.26 | 6.02 |
| Miami | 4.03 | 3.74 | 3.66 | 4.05 | 3.88 | 3.69 |
| New York | 3.97 | 3.93 | 3.75 | 3.93 | 3.79 | 3.81 |
| Philadelphia | 4.57 | 4.43 | 4.41 | 4.5 | 4.39 | 4.38 |
| Phoenix | 4.54 | 4.18 | 3.85 | 4.21 | 4.1 | 4.02 |
| Riverside | 5.82 | 4.87 | 4.12 | 4.76 | 5.01 | 5.39 |
| San Francisco | 4.34 | 4.3 | 4.02 | 4.33 | 4.27 | 4.11 |
| Seattle | 3.35 | 3.27 | 3.26 | 3.45 | 3.28 | 3.18 |

**Supplementary Table 11 |Low-CDR scenario population-weighted PM2.5 mortality in 2050.** Population weighted mortality for each bin across the 15 cities based on race-ethnicity and median household income

|  | **2050 Low-CDR** | | | | | |
| --- | --- | --- | --- | --- | --- | --- |
| Percent non-Hispanic white | | | Median household income percentile | | |
| 0-30% | 31-60% | 61-100% | 0-33rd | 33-66th | 66-100th |
| **All 15 cities combined** | 1.69 | 1.14 | 0.86 | 1.77 | 1.34 | 0.89 |
| Atlanta | 0.34 | 0.31 | 0.25 | 0.32 | 0.26 | 0.3 |
| Boston | 1.59 | 1.28 | 0.52 | 1.01 | 0.66 | 0.44 |
| Chicago | 1.62 | 1.48 | 0.98 | 1.59 | 1.13 | 0.96 |
| Dallas | 0.57 | 0.48 | 0.41 | 0.56 | 0.48 | 0.42 |
| D.C. | 0.76 | 0.64 | 0.54 | 0.85 | 0.66 | 0.53 |
| Detroit | 1.11 | 0.77 | 0.59 | 0.92 | 0.57 | 0.41 |
| Houston | 0.61 | 0.48 | 0.44 | 0.63 | 0.51 | 0.45 |
| Los Angeles | 1.84 | 1.37 | 1.58 | 2.12 | 1.58 | 1.07 |
| Miami | 1.03 | 0.7 | 0.75 | 1.17 | 0.82 | 0.56 |
| New York | 3.91 | 2.59 | 1.75 | 3.59 | 1.72 | 1.72 |
| Philadelphia | 2.4 | 1.33 | 0.71 | 1.76 | 0.65 | 0.33 |
| Phoenix | 0.49 | 0.46 | 0.49 | 0.62 | 0.6 | 0.37 |
| Riverside | 0.7 | 0.52 | 0.38 | 0.57 | 0.61 | 0.6 |
| San Francisco | 1.26 | 1.75 | 0.83 | 1.6 | 1.31 | 0.91 |
| Seattle | 0.53 | 0.49 | 0.42 | 0.55 | 0.5 | 0.37 |

**Supplementary Table 12 |****Slopes of the lines connecting high- and low-CDR scenarios**. Slope of the line connecting the points between high- and low-CDR scenarios for city-level differences in population weighted PM2.5 and mortality for Figure 5 and Extended Data Figs. 7-8.

|  | **PM2.5 concentrations** | | **PM2.5-deaths** | |
| --- | --- | --- | --- | --- |
| **Based on race** | **Based on income** | **Based on race** | **Based on income** |
| **All 15 cities combined** | 0.86 | 0.91 | 0.50 | 0.52 |
| Atlanta | 0.97 | 0.99 | 0.75 | 1.00 |
| Boston | 0.88 | 0.96 | 0.32 | 0.43 |
| Chicago | 0.96 | 0.97 | 0.59 | 0.60 |
| Dallas | 0.95 | 0.99 | 0.72 | 0.72 |
| D.C. | 0.97 | 0.98 | 0.68 | 0.62 |
| Detroit | 0.92 | 0.92 | 0.56 | 0.43 |
| Houston | 0.92 | 0.95 | 0.68 | 0.74 |
| Los Angeles | 0.95 | 0.95 | 0.88 | 0.50 |
| Miami | 0.92 | 0.92 | 0.69 | 0.49 |
| New York | 0.93 | 0.97 | 0.44 | 0.49 |
| Philadelphia | 0.96 | 0.98 | 0.30 | 0.20 |
| Phoenix | 0.85 | 0.95 | 1.00 | 0.59 |
| Riverside | 0.71 | 1.14 | 0.56 | 1.07 |
| San Francisco | 0.92 | 0.94 | 0.64 | 0.57 |
| Seattle | 0.98 | 0.91 | 0.79 | 0.67 |

**Supplementary Table 13 | Reduction per race-ethnicity and income group between high- and low-CDR scenarios for PM2.5 pollution in 2050**. Difference between the high- and low-CDR scenarios (high-CDR minus low-CDR) for each city for regions that are less than 30% white and more than 60% white, and regions below the 33rd median household income percentile for the city and above the 66th percentile for population-weighted PM2.5 concentrations (µg/m3). Values to calculate differences for each bin are in Supplementary Tables 8 and 10.

|  | **Percent non-Hispanic white** | | **Median household income percentile** | |
| --- | --- | --- | --- | --- |
| **0-30%** | **61-100%** | **0-33rd** | **66-100th** |
| **All 15 cities combined** | 1.46 | 1.26 | 1.44 | 1.31 |
| Atlanta | 1.35 | 1.31 | 1.34 | 1.33 |
| Boston | 1.21 | 1.07 | 1.13 | 1.08 |
| Chicago | 1.62 | 1.55 | 1.6 | 1.55 |
| Dallas | 1.65 | 1.57 | 1.63 | 1.61 |
| D.C. | 1.17 | 1.14 | 1.17 | 1.15 |
| Detroit | 1.33 | 1.22 | 1.29 | 1.19 |
| Houston | 1.77 | 1.63 | 1.76 | 1.67 |
| Los Angeles | 1.74 | 1.66 | 1.74 | 1.65 |
| Miami | 1.25 | 1.15 | 1.26 | 1.16 |
| New York | 1.21 | 1.13 | 1.2 | 1.16 |
| Philadelphia | 1.39 | 1.33 | 1.36 | 1.33 |
| Phoenix | 1.24 | 1.06 | 1.16 | 1.1 |
| Riverside | 1.59 | 1.13 | 1.3 | 1.48 |
| San Francisco | 1.28 | 1.18 | 1.27 | 1.2 |
| Seattle | 0.94 | 0.92 | 0.97 | 0.88 |

**Supplementary Table 14 | Reduction per race-ethnicity and income group between high- and low-CDR scenarios for mortality in 2050**. Difference between the high- and low-CDR scenarios (high-CDR minus low-CDR) for each city for regions that are less than 30% white and more than 60% white, and regions below the 33rd median household income percentile for the city and above the 66th percentile for population-weighted mortality (deaths). Values to calculate differences for each bin are in Supplementary Tables 9 and 11.

|  | **Percent non-Hispanic white** | | **Median household income percentile** | |
| --- | --- | --- | --- | --- |
| **0-30%** | **61-100%** | **0-33rd** | **66-100th** |
| **All 15 cities combined** | 0.48 | 0.24 | 0.5 | 0.26 |
| Atlanta | 0.08 | 0.06 | 0.08 | 0.08 |
| Boston | 0.47 | 0.15 | 0.3 | 0.13 |
| Chicago | 0.44 | 0.26 | 0.43 | 0.26 |
| Dallas | 0.18 | 0.13 | 0.18 | 0.13 |
| D.C. | 0.19 | 0.13 | 0.21 | 0.13 |
| Detroit | 0.27 | 0.15 | 0.23 | 0.1 |
| Houston | 0.19 | 0.13 | 0.19 | 0.14 |
| Los Angeles | 0.48 | 0.42 | 0.56 | 0.28 |
| Miami | 0.32 | 0.22 | 0.35 | 0.17 |
| New York | 1.15 | 0.51 | 1.05 | 0.51 |
| Philadelphia | 0.69 | 0.21 | 0.51 | 0.1 |
| Phoenix | 0.13 | 0.13 | 0.17 | 0.1 |
| Riverside | 0.18 | 0.1 | 0.15 | 0.16 |
| San Francisco | 0.36 | 0.23 | 0.46 | 0.26 |
| Seattle | 0.14 | 0.11 | 0.15 | 0.1 |

**Supplementary Table 15 |** **GCAM** **total mitigation costs for the U.S.** Mitigation costs for our net-zero scenarios for 2020-2050 in trillion 2023 USD. For discounted value we discount for 2050 (27-year time).

|  | **No discount rate** | **3% discount rate** | **7 % discount rate** |
| --- | --- | --- | --- |
| Net-zero High-CDR | 1.87 | 0.84 | 0.30 |
| Net-zero Low-CDR | 3.37 | 1.52 | 0.54 |

**Supplementary Table 16 |** **Economic valuation.** 9km value of statistical life (VSL) for our scenarios in trillion 2023 USD. We use the EPA’s VSL of $8.7 million embedded in BenMAP-CE (in 2015 USD, or 11.2 million in 2023 USD). We discount values for 2050 (27-year time) and show the 95% confidence intervals.

|  | **No discount rate** | | **3% discount rate** | | **7 % discount rate** | |
| --- | --- | --- | --- | --- | --- | --- |
| **Value** | **95% CI** | **Value** | **95% CI** | **Value** | **95% CI** |
| Reference-BAU | 2.49 | 0.22-6.64 | 1.12 | 0.10-2.99 | 0.40 | 0.04-1.07 |
| Net-zero High-CDR | 1.95 | 0.17-5.20 | 0.88 | 0.08-2.34 | 0.31 | 0.03-0.84 |
| Net-zero Low-CDR | 1.56 | 0.14-4.17 | 0.70 | 0.06-1.88 | 0.25 | 0.0.2-0.67 |

**Supplementary Table 17 |** **Modified emission factors**. New emission factors for electricity generation with carbon capture and storage modified in GCAM following technical report No. 14 from the European Environment Agency67

| **Fuel** | **Technology** |  | **Emission Factors (Mt/EJ)** | | | |
| --- | --- | --- | --- | --- | --- | --- |
| **SO2** | **NOx** | **PM2.5** | **PM10** |
| Biomass | Conventional CCS | original | 0.03440 | 0.00861 | 0.03110 | 0.03470 |
| modified | 0.00516 | 0.00809 | 0.02208 | 0.02464 |
| IGCC CCS | original | 0.00000 | 0.00473 | 0.00013 | 0.00013 |
| modified | 0.00000 | 0.00445 | 0.00009 | 0.00009 |
| Coal | Conventional CCS | original | 0.02580 | 0.03010 | 0.01600 | 0.02130 |
| modified | 0.00387 | 0.02829 | 0.01136 | 0.01512 |
| IGCC CCS | original | 0.00645 | 0.00559 | 0.06960 | 0.23900 |
| modified | 0.00097 | 0.00525 | 0.04942 | 0.16969 |
| Gas | CC CCS | original | 0.00000 | 0.00473 | 0.00013 | 0.00013 |
| modified | 0.00000 | 0.00445 | 0.00009 | 0.00009 |
| Oil | CC CCS | original | 0.03110 | 0.24300 | 0.00623 | 0.02460 |
| modified | 0.00467 | 0.22842 | 0.00442 | 0.01747 |

**SupplementaryTable 18 |** Horizontal configuration of 12 nested 1-km domains in CMAQ simulations

| **Domain** | **X_start** | **Y_start** | **X_end** | **Y_end** | **Resolution (m)** | **Columns** | **Rows** | **Main cities** |
| --- | --- | --- | --- | --- | --- | --- | --- | --- |
| 1 | -2001000 | 945000 | -1700000 | 1245000 | 1000 | 301 | 300 | Seattle–Tacoma–Bellevue, WA |
| 2 | -2140000 | -790000 | -1150000 | -172000 | 1000 | 990 | 618 | Los Angeles–Long Beach–Anaheim, CA  Riverside–San Bernardino–Ontario, CA  Phoenix–Mesa–Chandler, AZ |
| 3 | -165000 | -940000 | 170000 | -660000 | 1000 | 335 | 280 | Dallas–Fort Worth–Arlington, TX |
| 4 | -10000 | -1272000 | 297000 | -990000 | 1000 | 307 | 282 | Houston–Pasadena–The Woodlands, TX |
| 5 | 1560000 | -1554000 | 1782000 | -1217000 | 1000 | 222 | 337 | Miami–Fort Lauderdale–West Palm Beach, FL |
| 6 | 1017000 | -761000 | 1317000 | -453000 | 1000 | 300 | 308 | Atlanta–Sandy Springs–Roswell, GA |
| 7 | 610000 | 57000 | 891000 | 388000 | 1000 | 281 | 331 | Chicago–Naperville–Elgin, IL-IN |
| 8 | 1456000 | -112000 | 1826000 | 214000 | 1000 | 370 | 326 | Washington–Arlington–Alexandria, D.C.-VA-MD-WV |
| 9 | 1604000 | 67000 | 2187000 | 532000 | 1000 | 583 | 465 | Philadelphia–Camden–Wilmington, PA-NJ-DE-MD  New York–Newark–Jersey City, NY-NJ |
| 10 | 1938000 | 400000 | 2239000 | 759000 | 1000 | 301 | 359 | Boston–Cambridge–Newton, MA-NH |
| 11 | 957000 | 260000 | 1239000 | 506000 | 1000 | 282 | 246 | Detroit–Warren–Dearborn, MI |
| 12 | -2306000 | -61000 | -2033000 | 176000 | 1000 | 273 | 237 | San Francisco–Oakland–Fremont, CA |

**Supplementary Table 19 |** Configurations of the WRF-CMAQ modelling

| **Model** | **Parameter** | **Configuration schemes** |
| --- | --- | --- |
| WRF | Horizontal resolution | First domain: 9km, 612 (column) × 399 (row) |
| Nested domain: 1km, 12 nested domains |
| Vertical resolution | 23 sigma levels from surface to tropopause |
| Simulation cases | All fixed with the meteorology in 2019 (Base-year) |
| Simulation period | The whole year with one-month spin-up |
| IC and BC | Final analysis data from NCEP |
| Shortwave radiation | New Goddard scheme |
| Longwave radiation | RRTM scheme |
| Surface layer | Pleim–Xiu scheme |
| Planetary boundary layer | ACM2 scheme |
| Cumulus | Kain–Fritsch scheme |
| Cloud microphysics | WSM6 scheme |
| Nudging | Analysis nudging, observational nudging, soil nudging were conducted |
| CMAQ | Horizontal resolution | First domain: 9km, 612 (column) × 399 (row) |
| Nested domain: 1km, 12 nested domains (Supplementary Table 18) |
| Vertical resolution | 14 sigma levels from surface to tropopause: 1.000, 0.9975, 0.995, 0.992, 0.986, 0.980, 0.970, 0.965, 0.938, 0.916, 0.893, 0.868, 0.808, 0.777, 0.744, 0.648, 0.500, 0.400, 0.300, 0.200, 0.120, 0.052, 0.000. |
| Simulation cases | Historical: 2019 (Base-year)  Future: Three future scenarios in 2050 |
| Simulation period | The whole year with one-month spin-up |
| IC and BC | Dynamic GEOS-Chem global simulation outputs |
| Gas-phase mechanism | CB05 |
| Aqueous-phase mechanism | RADM |
| Aerosol module | AERO6 |
| Cloud module | ACM_AE6 ACM cloud processor |
| Photolytic rate | In-line calculation |
| Anthropogenic emissions | Historical: NEI for U.S.; CEDS for other countries  Future: NEI+GCAM for U.S.; CMIP6 for other countries |
| Biogenic emissions | MEGANv2.1 |
| Open biomass burning | GFED4 (fixed in base-year level) |
| Dust | In-line calculation |
| Lightning | Not included |

**Supplementary Table 20 |** **Income cutoff thresholds**. Median household income ranges for income bins specific to each MSA in 2019 USD with data from ACSDT5Y2019.B19013

| **MSA name** | **0 – 33rd** | **33rd – 66th** | **66th – 100th** |
| --- | --- | --- | --- |
| Atlanta–Sandy Springs–Roswell, GA | 9,792 – 56,049 | 56,050 – 72,583 | 72,584 – 250,000 |
| Boston–Cambridge–Newton, MA-NH | 22,375 – 96,071 | 96,072 – 121,602 | 121,603 – 250,000 |
| Chicago–Naperville–Elgin, IL-IN | 8,865 – 70,820 | 70,821 – 93,780 | 93,781 – 250,000 |
| Dallas–Fort Worth–Arlington, TX | 11,978 – 63,333 | 63,334 – 84,038 | 84,039 – 250,000 |
| Detroit–Warren–Dearborn, MI | 13,638 – 66,562 | 66,563 – 85,893 | 85,893 – 246,868 |
| Houston–Pasadena–The Woodlands, TX | 15,568 – 58,256 | 58,256 – 82,188 | 82,189 – 250,000 |
| Los Angeles–Long Beach–Anaheim, CA | 12,661 – 70,589 | 70,590 – 102,559 | 102,560 – 250,000 |
| Miami–Fort Lauderdale–West Palm Beach, FL | 16,168 – 59,547 | 59,548 – 75,556 | 75,557 – 250,000 |
| New York–Newark–Jersey City, NY-NJ | 14,167 – 90,961 | 90,962 – 127,661 | 127,662 – 250,000 |
| Philadelphia–Camden–Wilmington, PA-NJ-DE-MD | 15,250 – 82,732 | 82,733 – 105,266 | 105,267 – 250,000 |
| Phoenix–Mesa–Chandler, AZ | 14,474 – 50,714 | 50,715 – 64,468 | 64,469 – 250,000 |
| Riverside–San Bernardino–Ontario, CA | 8,888 – 40,887 | 40,888 – 47,112 | 47,113 – 190,114 |
| San Francisco–Oakland–Fremont, CA | 17,283 – 112,188 | 112,189 – 149,205 | 149,206 – 250,000 |
| Seattle–Tacoma–Bellevue, WA | 20,600 – 71,797 | 71,798 – 95,188 | 95,189 – 250,000 |
| Washington–Arlington–Alexandria, DC-VA-MD-WV | 24,055 – 85,417 | 85,418 – 118,511 | 118,512 – 250,000 |
| **All 15 MSAs combined** | **8,865 – 55,655** | **55,656 – 84,768** | **84,769 – 250,000** |
